# Supplementary material for: All models are wrong, but are they useful? Assessing reliability across multiple sites to build trust in urban drainage modelling
Source: Copernicus journal article supplement (doi:10.5194/egusphere-2022-615), 2022-07-25
Supplement: Supplementary file 1 [file egusphere-2022-615-supplement.pdf]

**Supplementary Material** for “All models are wrong, but are they useful? Assessing reliability across multiple sites to build trust in urban drainage modelling” by Agnethe Pedersen, Annette Brink-Kjær and Peter Steen Mikkelsen (in review, 2022)

## Table of contents

1. Multi-event signature comparison plots for all sites for different objectives
2. Performance scores for different objectives
3. Maps of the different objectives for the method linear regression

### 1. Multi-event signature comparison plots for all sites for different objectives

The following pages include an extract om multi-event signature comparison plots for each of the 23 sites included in the study (see list of sites in Table 12 in the main article). A standardised format is used, showing for each site:

- Upper panel, left (A): Modelled vs. observed peak values, across the whole continues range of possible values, showing also important threshold values (CSL, CL, TOP, ZP, IL).
- Upper panel, middle: Listing of important information explaining the background of the other plots (observation period start and end data, duration, number of rain induced events; and for each of the 3 objectives (surcharge, overflow, everyday events) furthermore the categorical analysis metrics CSI, number of TPs, and number of total positives (TP+FP+FN).
- Other panels: Modelled vs. observed signature values for true positives of the 3 objectives surcharge (D, E, F – 3 signatures), overflow (G, H – 2 signatures) and everyday events (I, J, K, L – 4 signatures). Important elements of the three statistical methods: linear regression (dashed black line), indicator function (acceptance criteria with purple) and normalised RMSE (blue lines indicating IQR) are shown on each plot.

In all cases the individual events are shown using colour codes that indicate the weighting used (explained in colour bar, and section 2.3.2 of the main manuscript).

# Supplementary Material:

All models are wrong, but are they useful? Assessing reliability across multiple sites to build trust in urban drainage modelling  
Agnethe Nedergaard Pedersen, Annette Brink-Kjær and Peter Steen Mikkelsen

F60F44Y

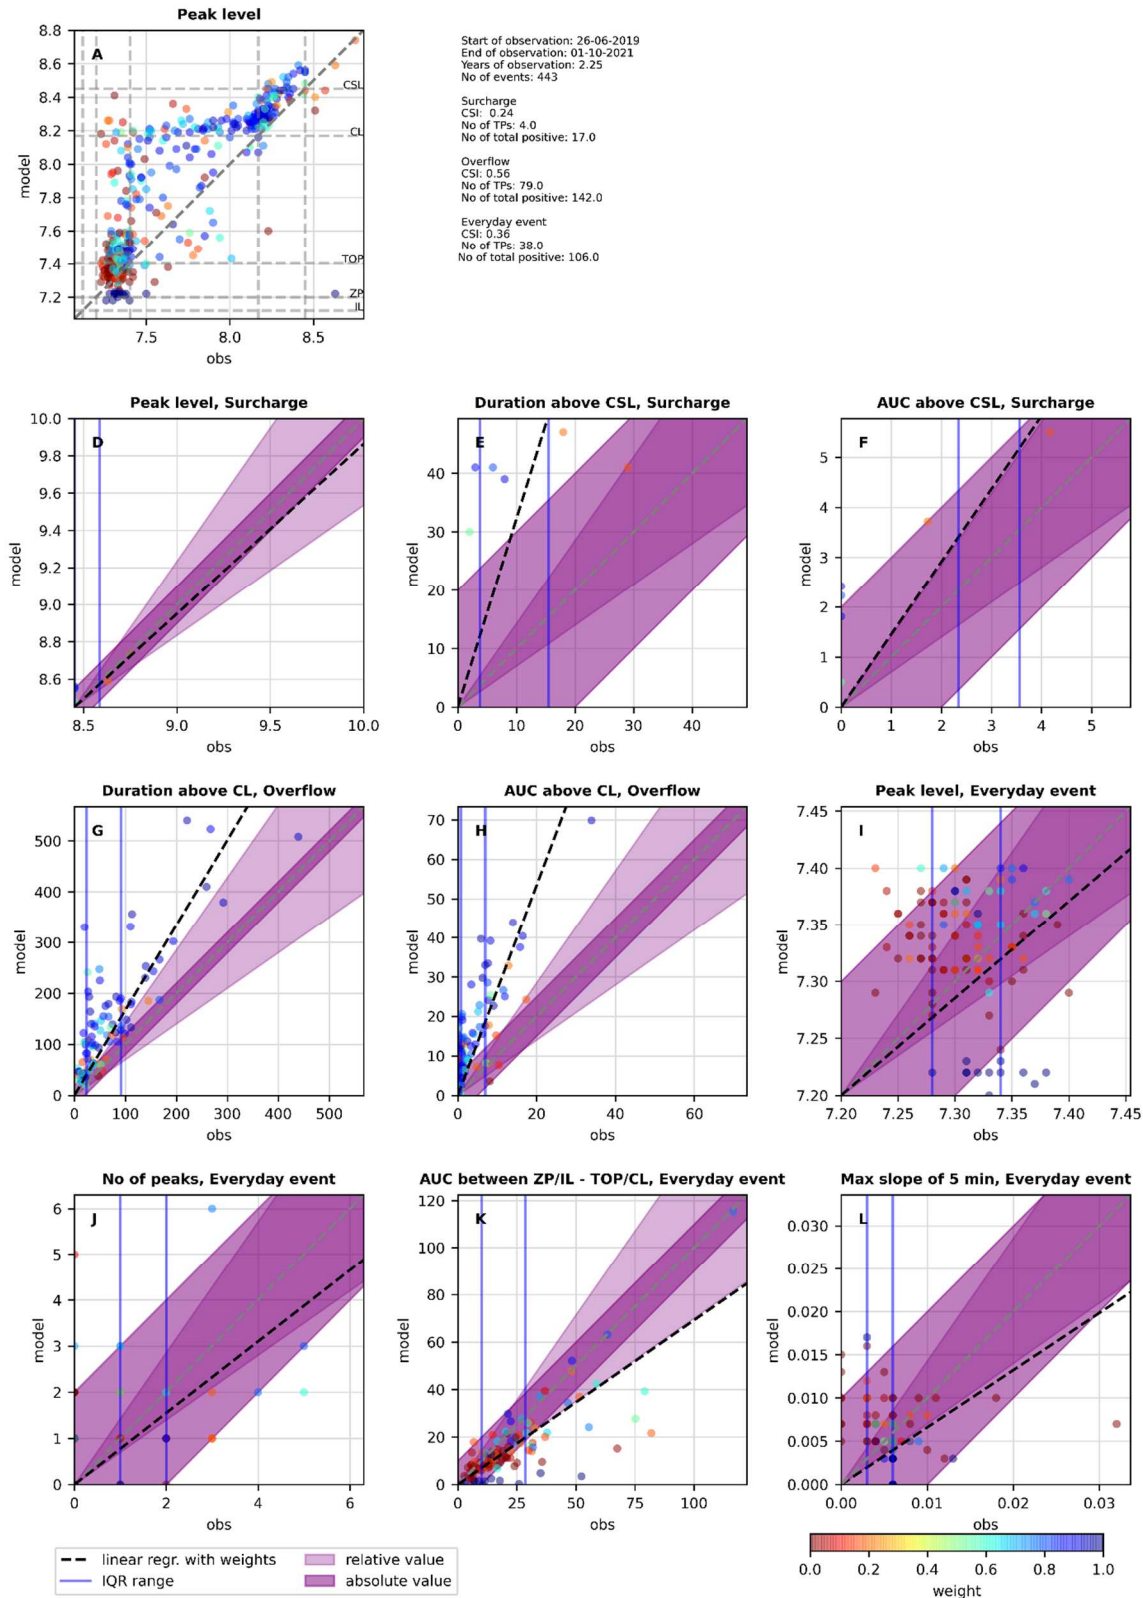

**Figure S1: Multi-event signature comparison plots for the signatures analyzing the three objectives; surcharge, overflow and everyday events.**

## Supplementary Material:

All models are wrong, but are they useful? Assessing reliability across multiple sites to build trust in urban drainage modelling  
Agnethe Nedergaard Pedersen, Annette Brink-Kjær and Peter Steen Mikkelsen

F64F45Y

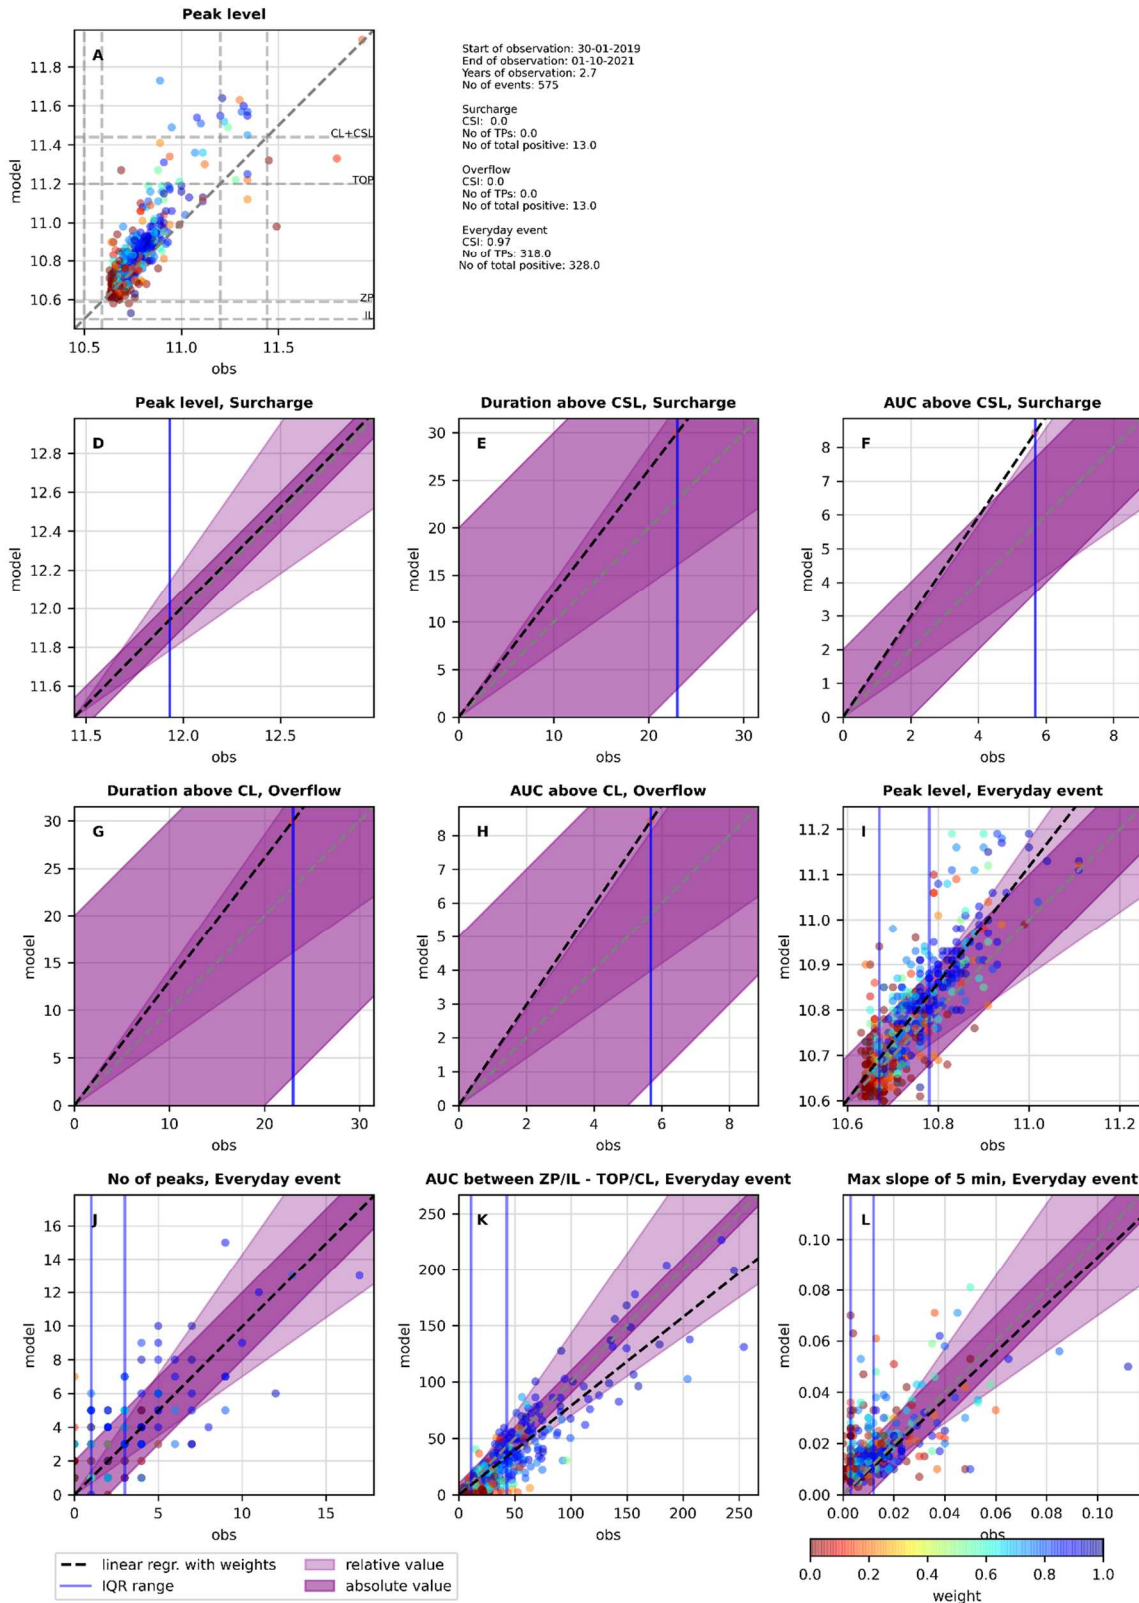

**Figure S2: Multi-event signature comparison plots for the signatures analyzing the three objectives; surcharge, overflow and everyday events.**

# Supplementary Material:

All models are wrong, but are they useful? Assessing reliability across multiple sites to build trust in urban drainage modelling  
Agnethe Nedergaard Pedersen, Annette Brink-Kjær and Peter Steen Mikkelsen

F64F220

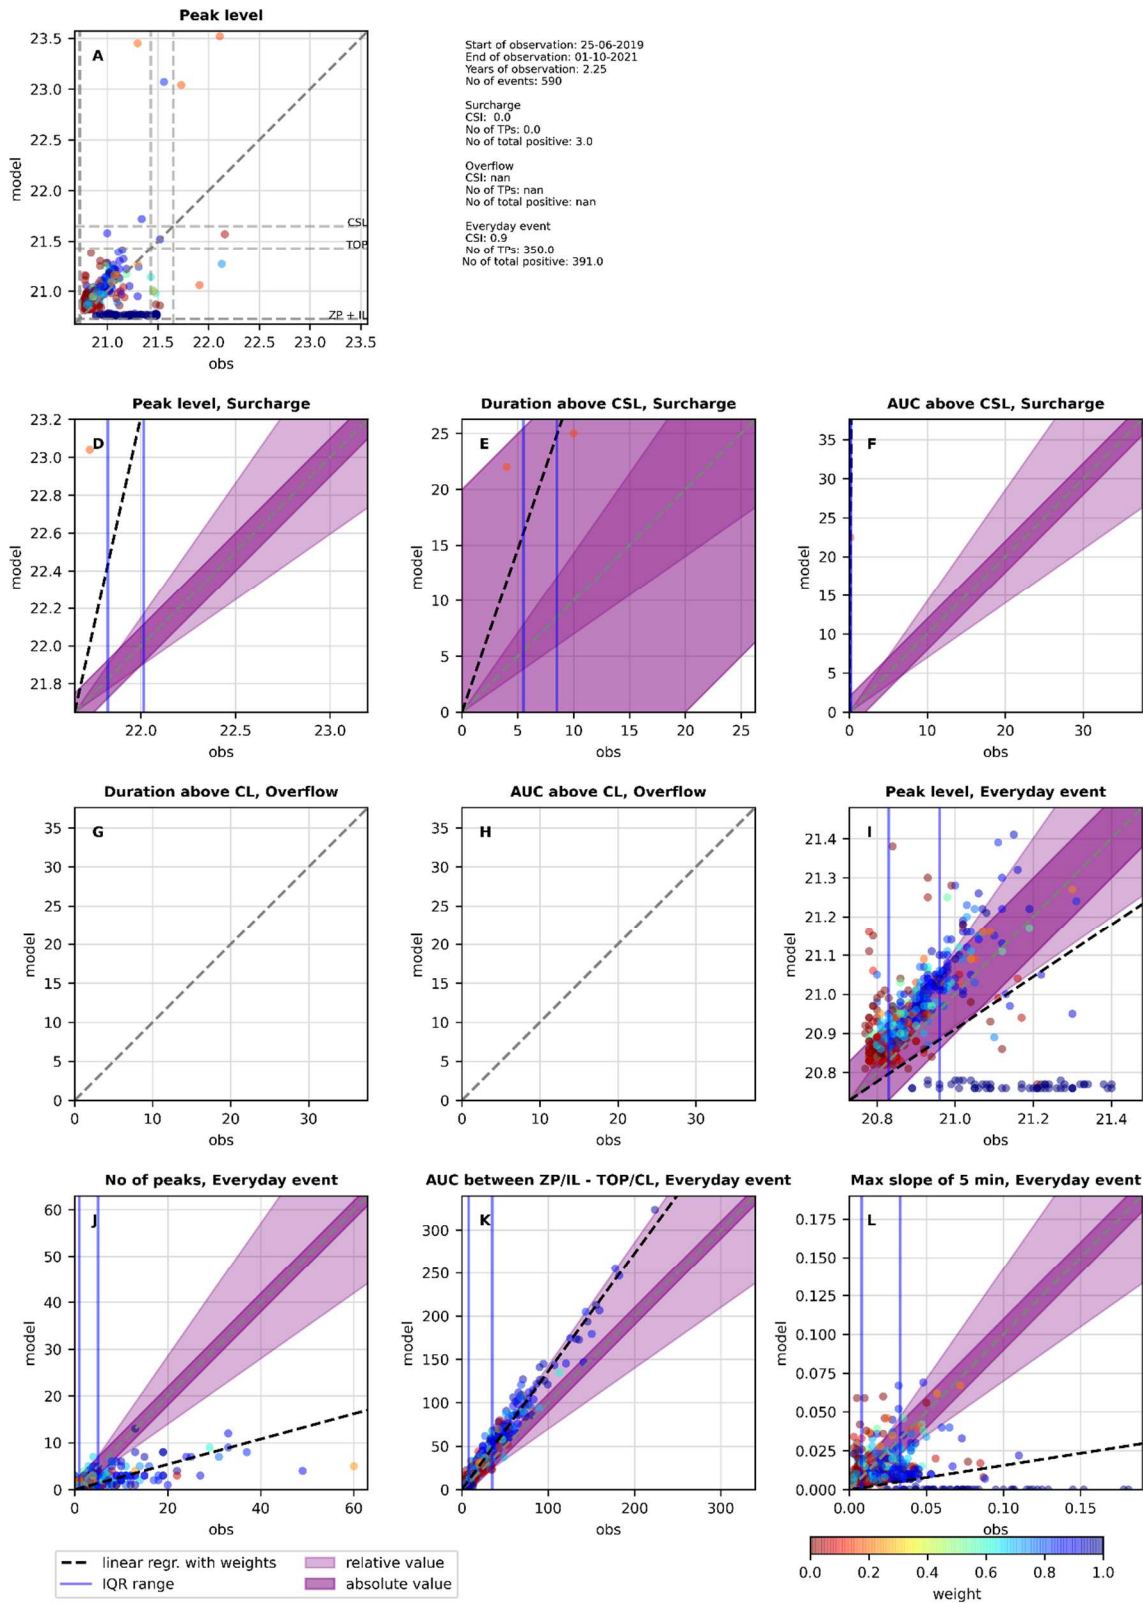

**Figure S3: Multi-event signature comparison plots for the signatures analyzing the three objectives; surcharge, overflow and everyday events.**



# Supplementary Material:

All models are wrong, but are they useful? Assessing reliability across multiple sites to build trust in urban drainage modelling  
Agnethe Nedergaard Pedersen, Annette Brink-Kjær and Peter Steen Mikkelsen

F64F46Y

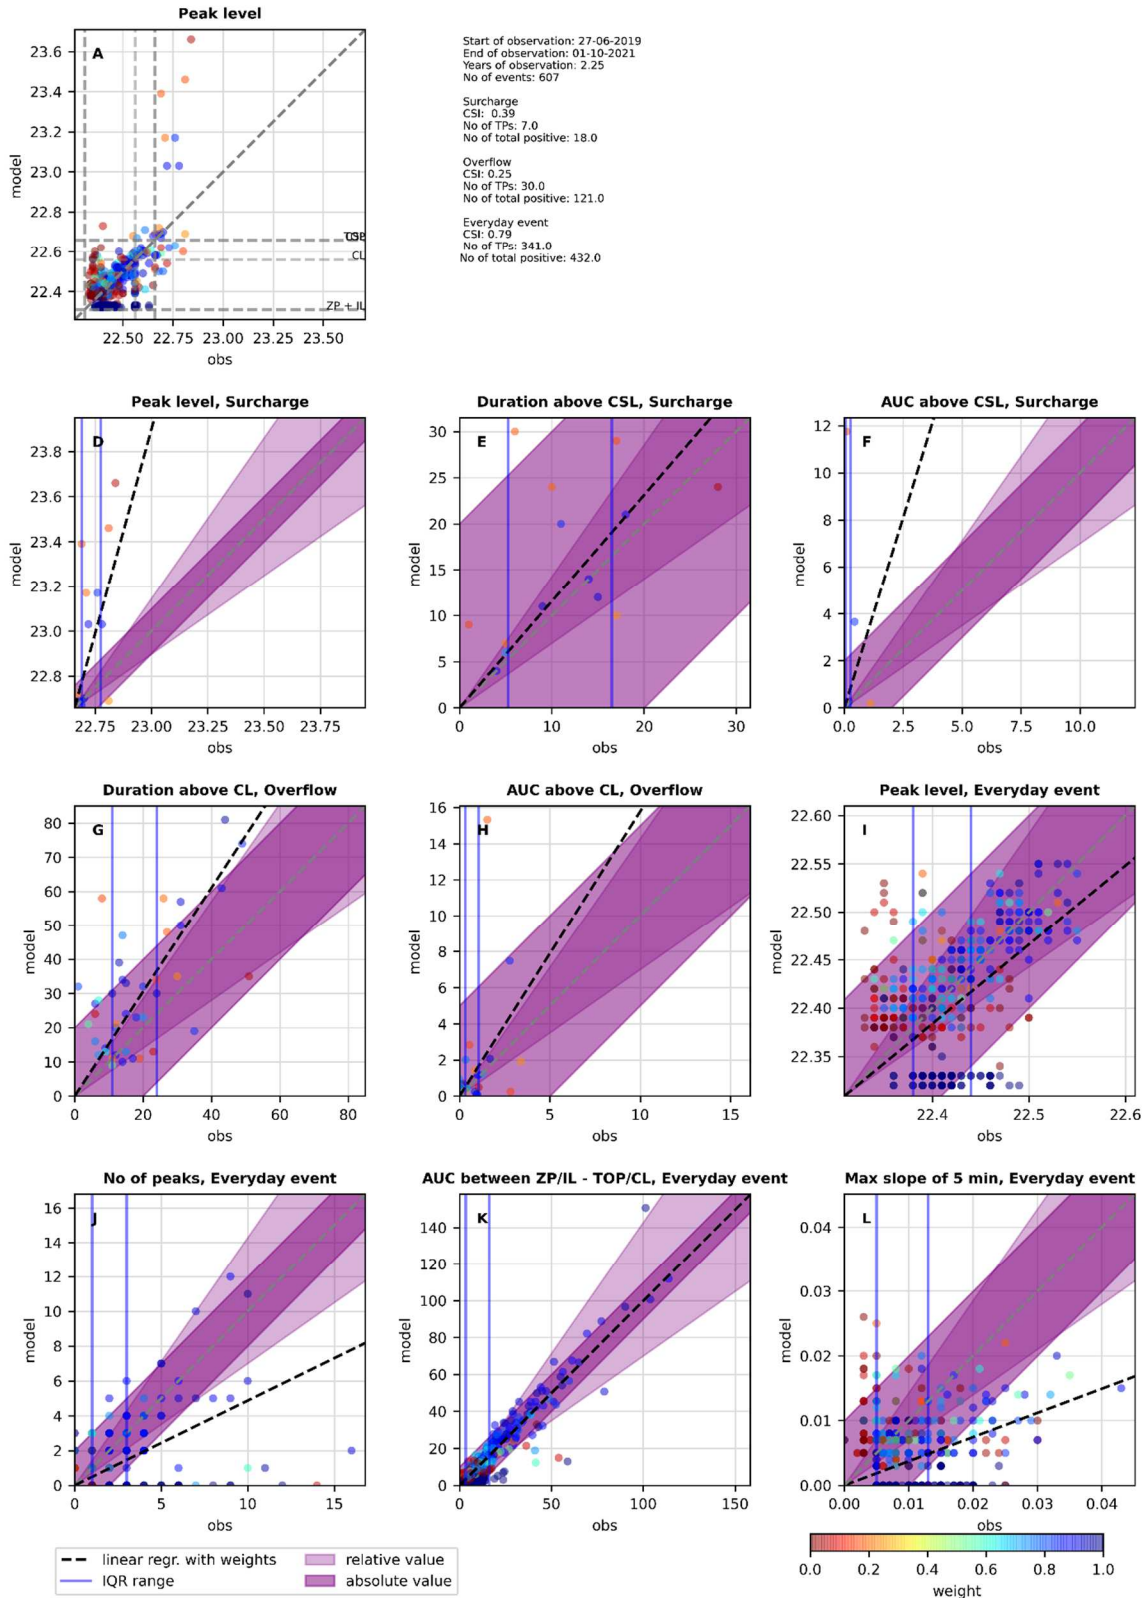

Figure S4: Multi-event signature comparison plots for the signatures analyzing the three objectives; surcharge, overflow and everyday events.

# Supplementary Material:

All models are wrong, but are they useful? Assessing reliability across multiple sites to build trust in urban drainage modelling  
Agnethe Nedergaard Pedersen, Annette Brink-Kjær and Peter Steen Mikkelsen

F67F47Y

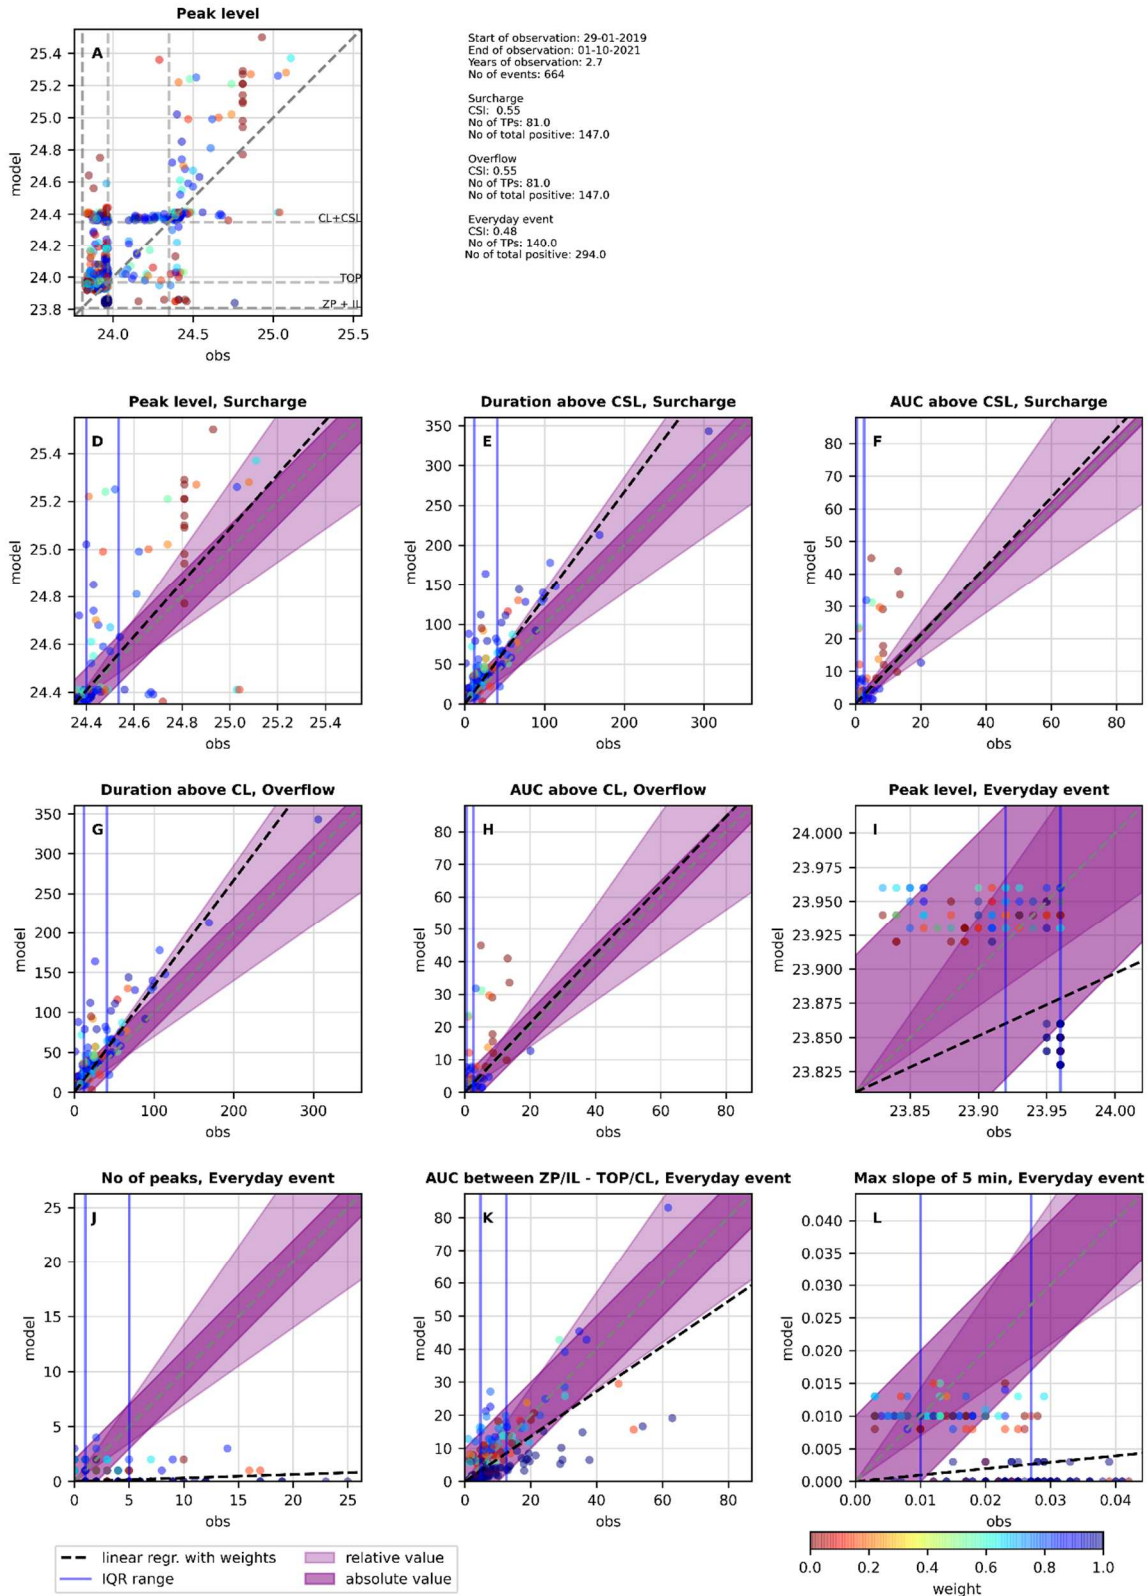

**Figure S5: Multi-event signature comparison plots for the signatures analyzing the three objectives; surcharge, overflow and everyday events.**

F70F10R

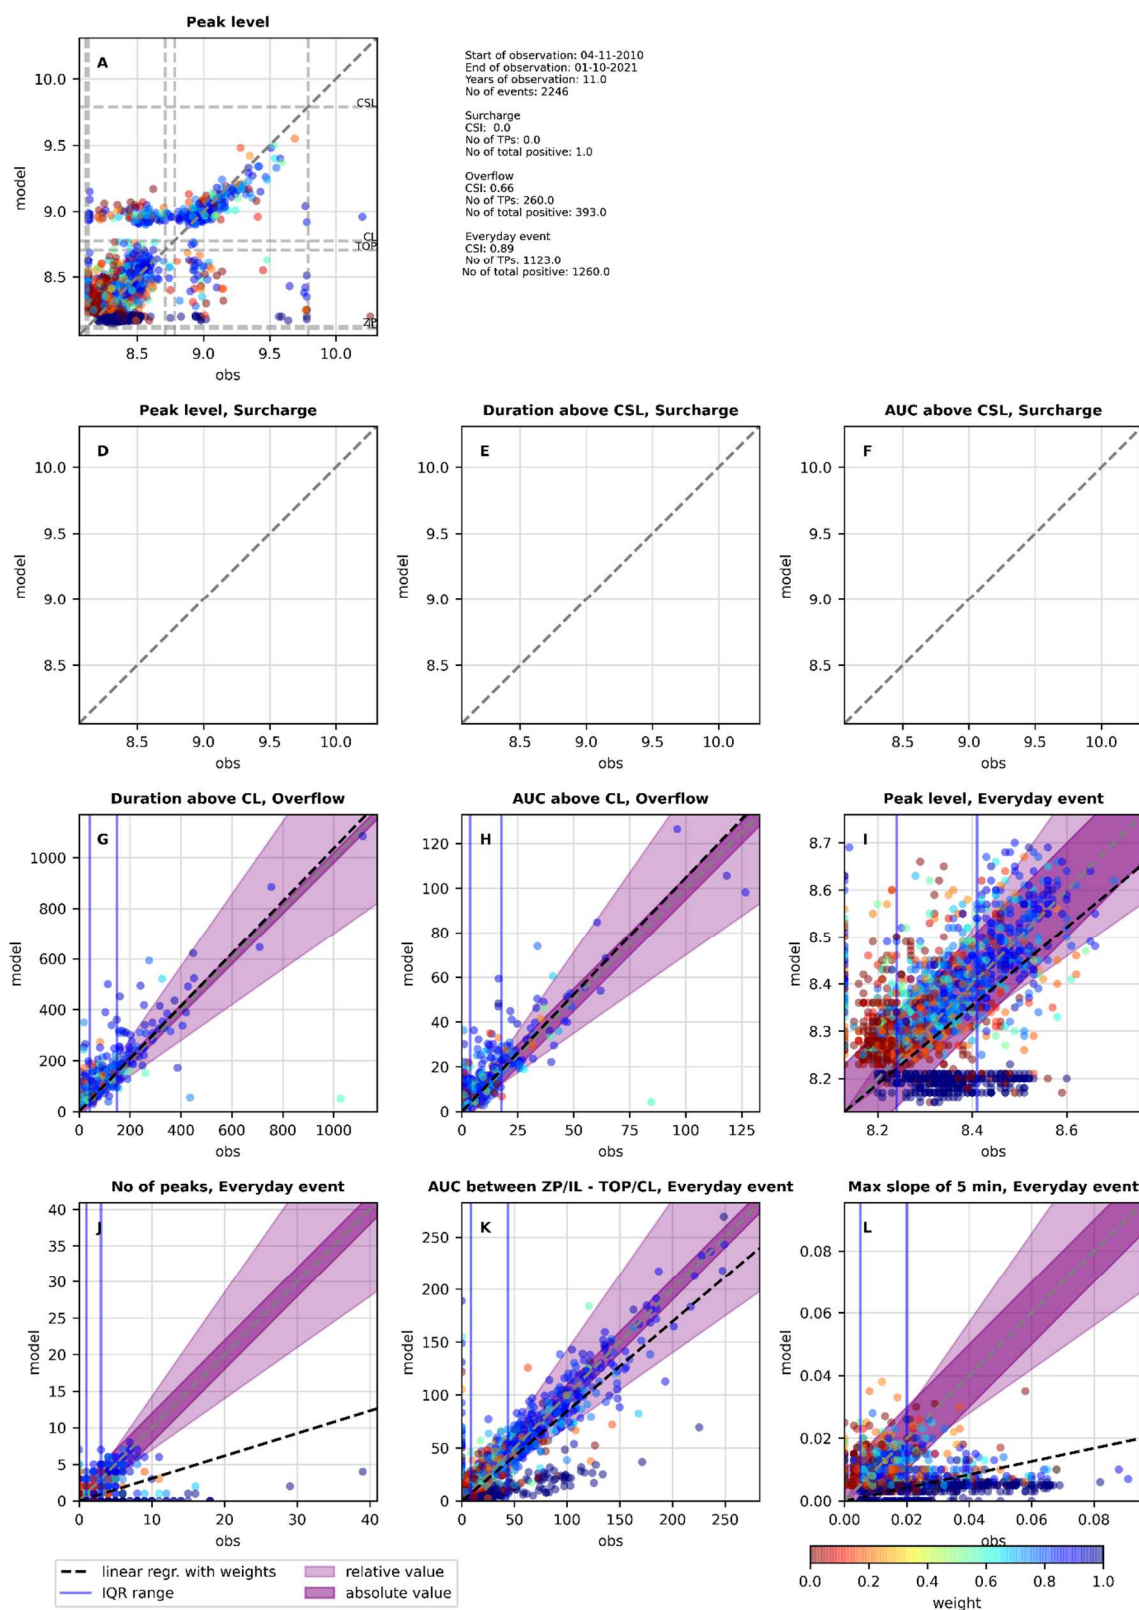

Figure S6: Multi-event signature comparison plots for the signatures analyzing the three objectives; surcharge, overflow and everyday events.

# Supplementary Material:

All models are wrong, but are they useful? Assessing reliability across multiple sites to build trust in urban drainage modelling  
Agnethe Nedergaard Pedersen, Annette Brink-Kjær and Peter Steen Mikkelsen

## F70F20P\_LevelBasin

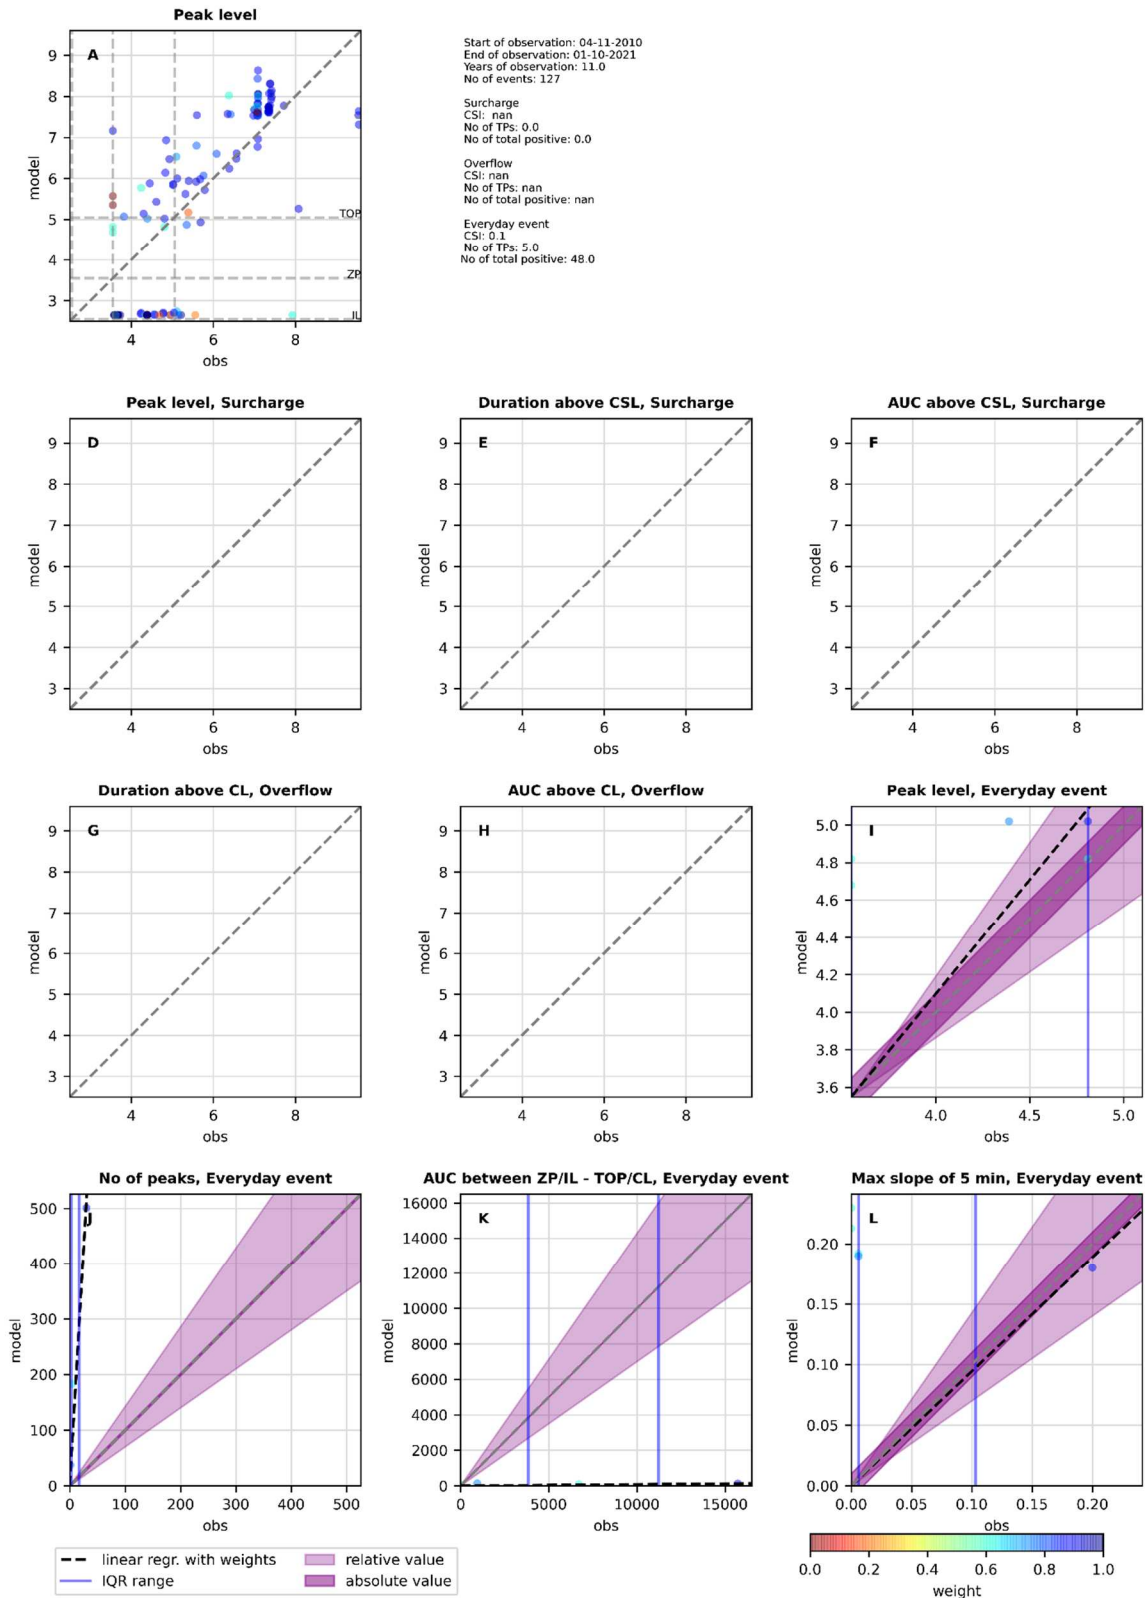

**Figure S7: Multi-event signature comparison plots for the signatures analyzing the three objectives; surcharge, overflow and everyday events.**



# Supplementary Material:

All models are wrong, but are they useful? Assessing reliability across multiple sites to build trust in urban drainage modelling  
Agnethe Nedergaard Pedersen, Annette Brink-Kjær and Peter Steen Mikkelsen

## F70F20P\_LevelIPS

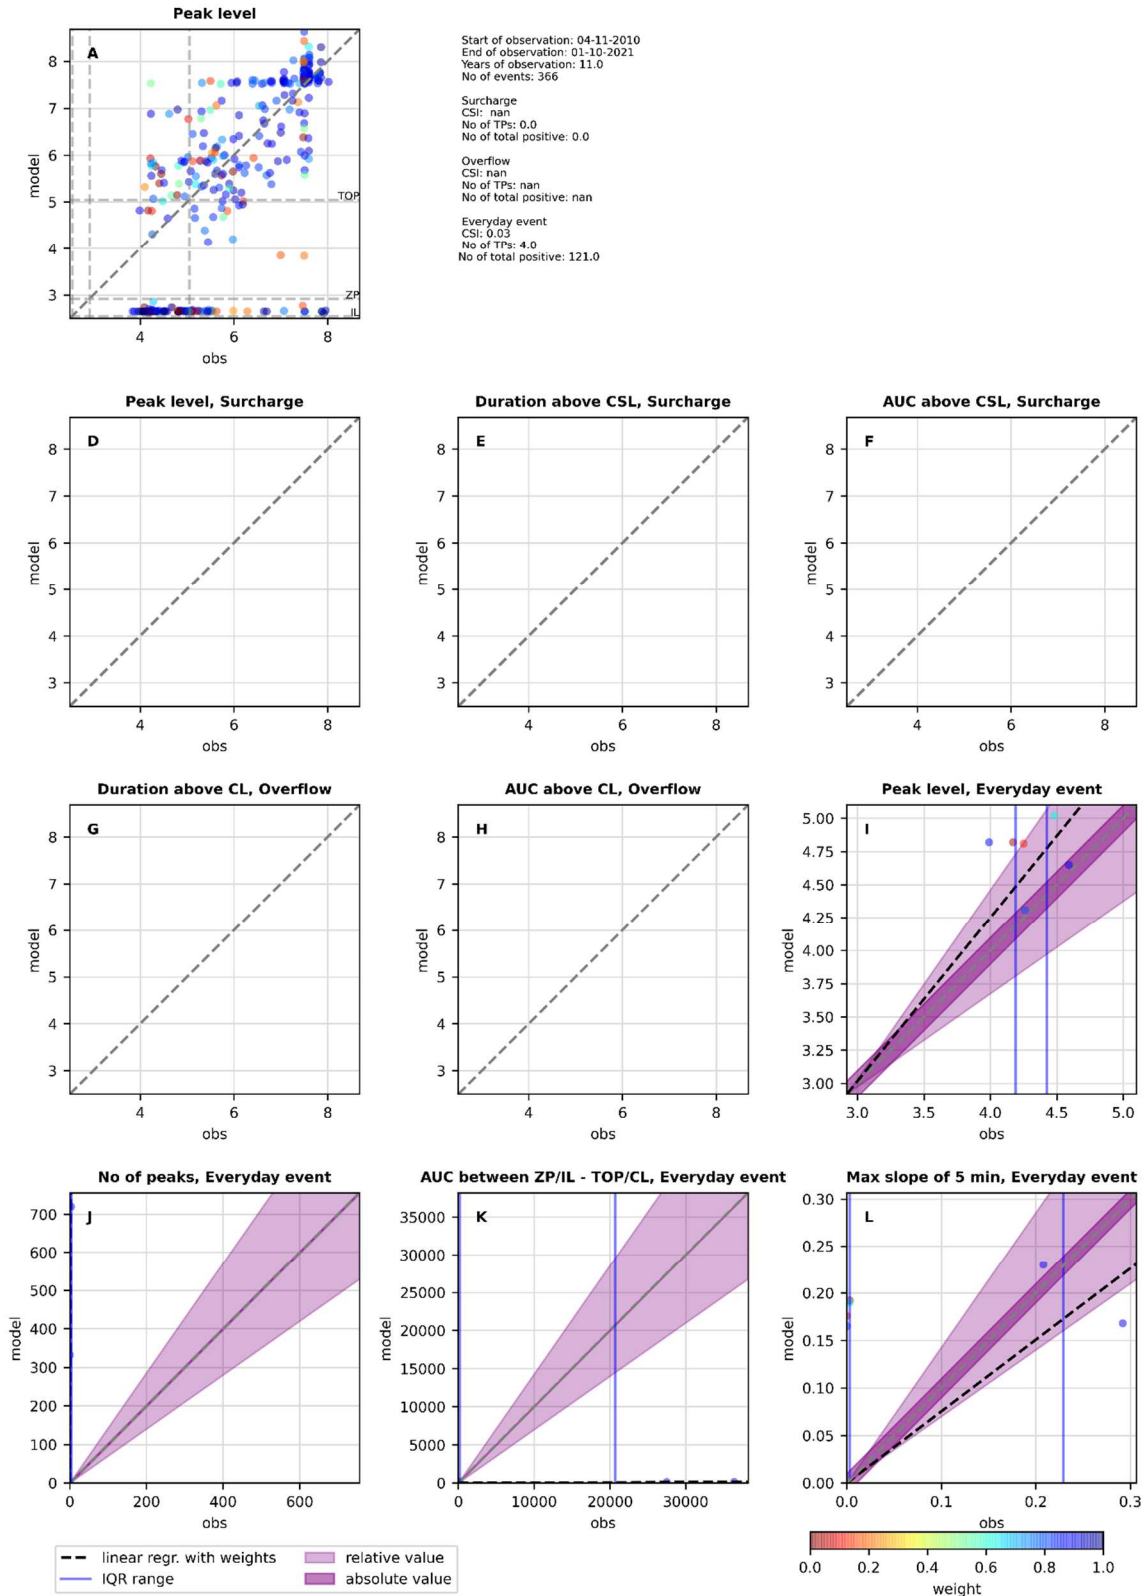

**Figure S8: Multi-event signature comparison plots for the signatures analyzing the three objectives; surcharge, overflow and everyday events.**



# Supplementary Material:

All models are wrong, but are they useful? Assessing reliability across multiple sites to build trust in urban drainage modelling  
Agnethe Nedergaard Pedersen, Annette Brink-Kjær and Peter Steen Mikkelsen

F70F70Y\_LevelSump

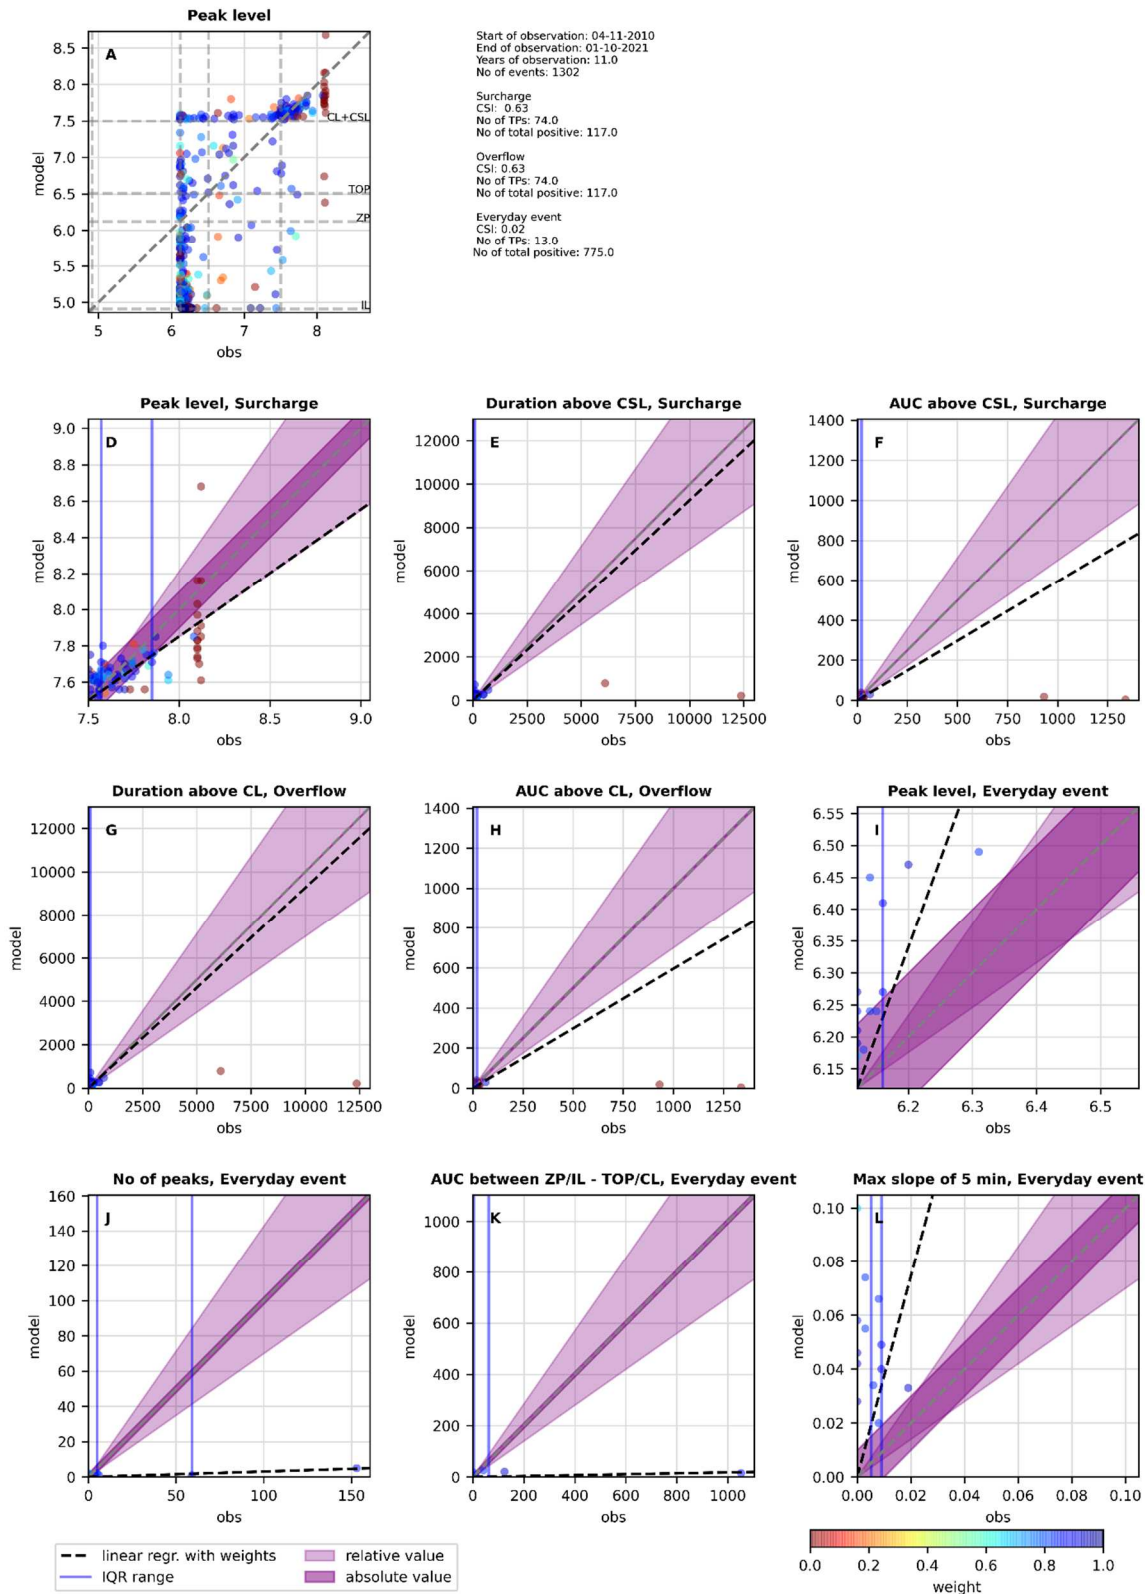

**Figure S9: Multi-event signature comparison plots for the signatures analyzing the three objectives; surcharge, overflow and everyday events.**

# Supplementary Material:

All models are wrong, but are they useful? Assessing reliability across multiple sites to build trust in urban drainage modelling  
Agnethe Nedergaard Pedersen, Annette Brink-Kjær and Peter Steen Mikkelsen

## F71F10F\_LevelInlet

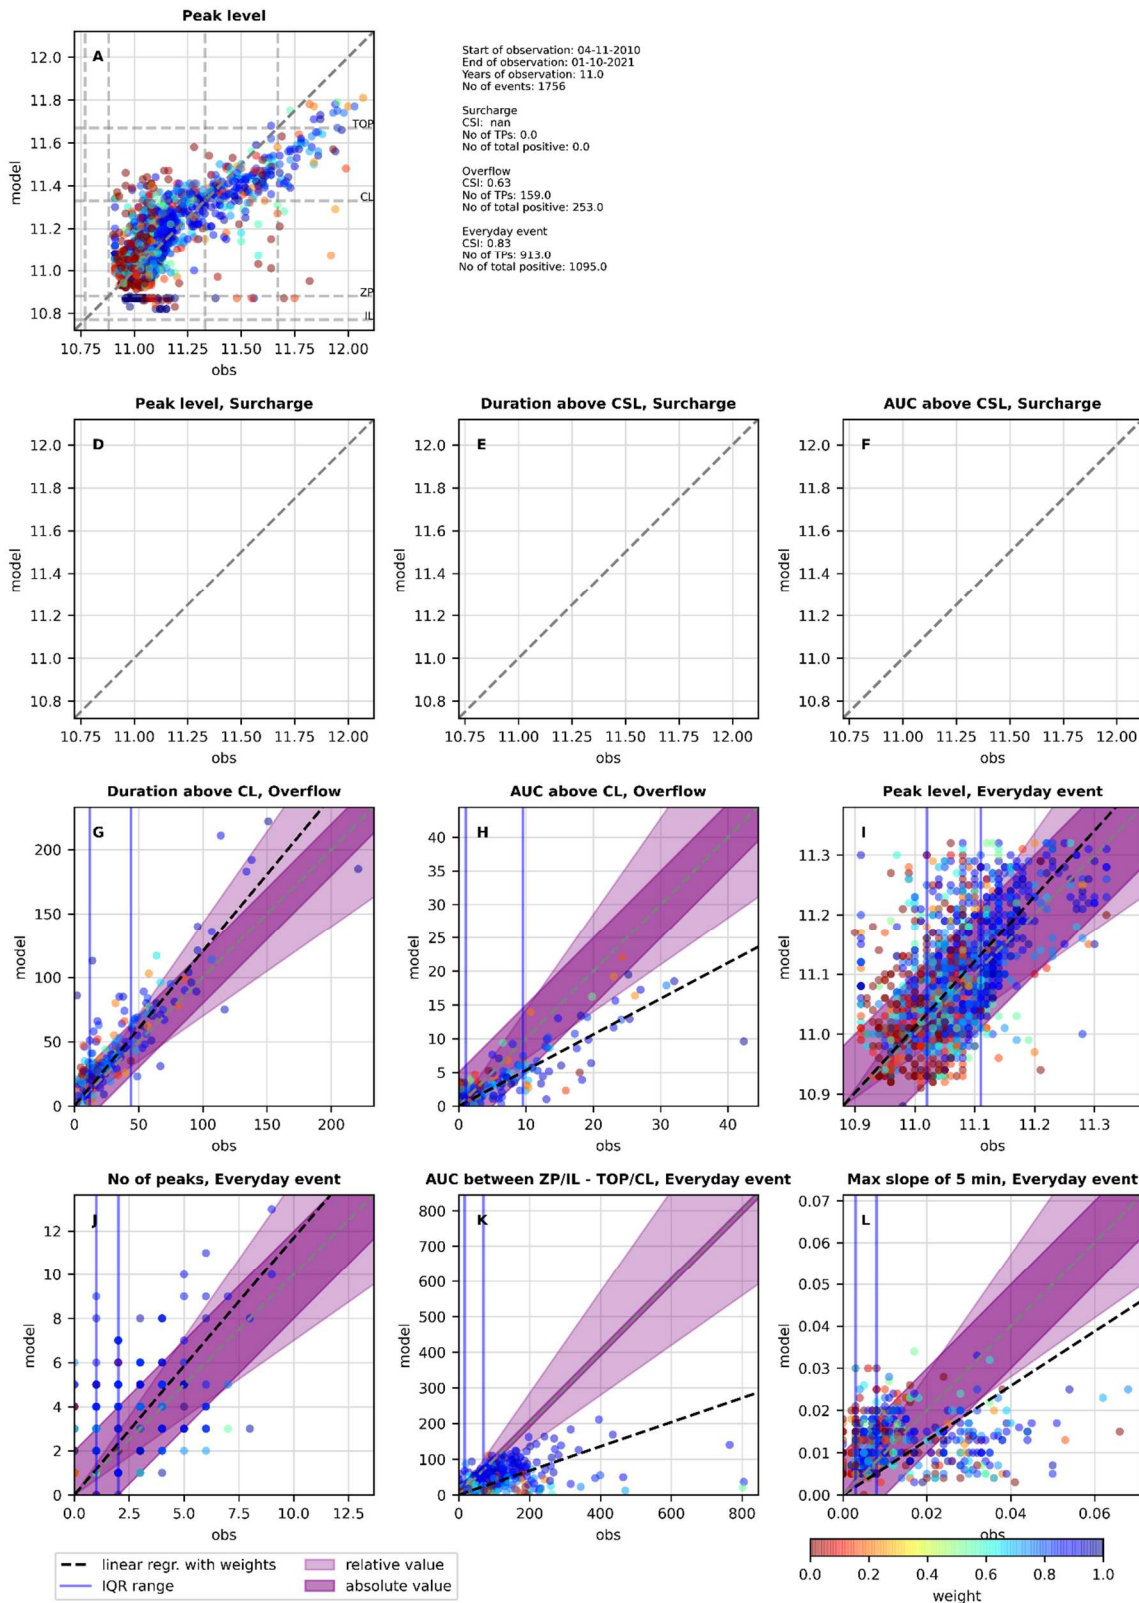

**Figure S10: Multi-event signature comparison plots for the signatures analyzing the three objectives; surcharge, overflow and everyday events.**

## Supplementary Material:

All models are wrong, but are they useful? Assessing reliability across multiple sites to build trust in urban drainage modelling  
Agnethe Nedergaard Pedersen, Annette Brink-Kjær and Peter Steen Mikkelsen

### F71F10F\_LevelPipeBasin

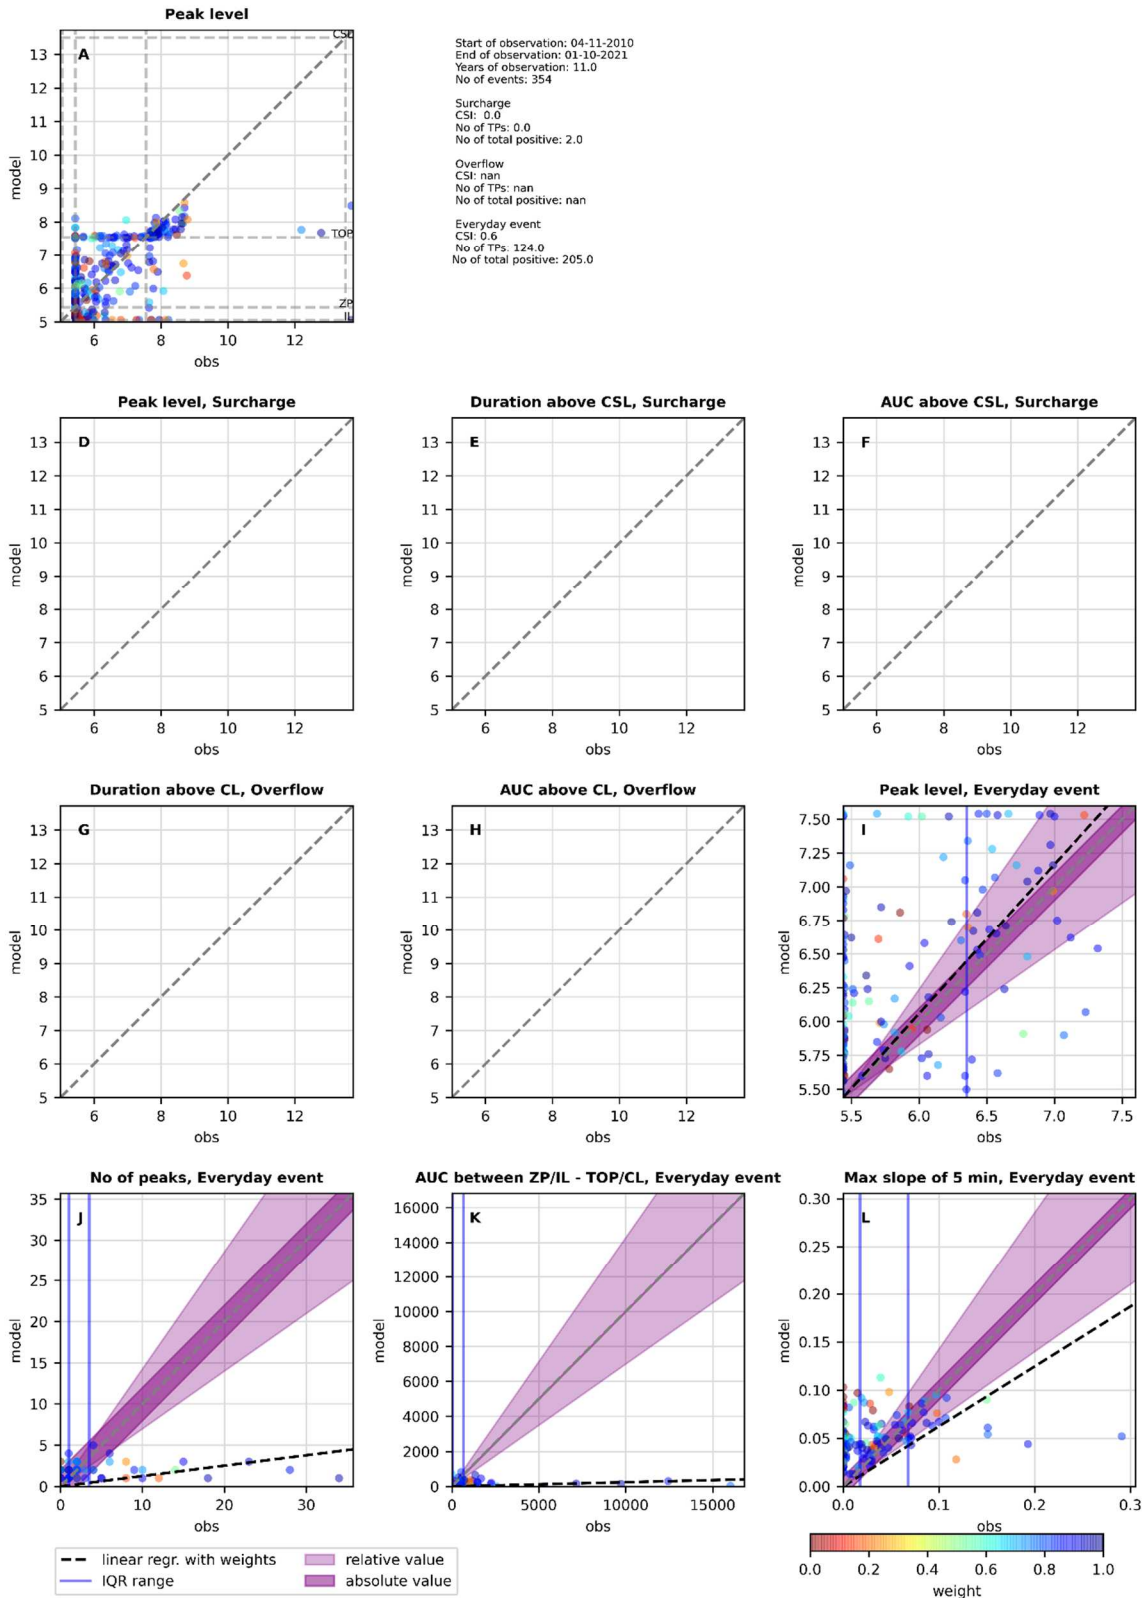

**Figure S11: Multi-event signature comparison plots for the signatures analyzing the three objectives; surcharge, overflow and everyday events.**

# Supplementary Material:

All models are wrong, but are they useful? Assessing reliability across multiple sites to build trust in urban drainage modelling  
Agnethe Nedergaard Pedersen, Annette Brink-Kjær and Peter Steen Mikkelsen

F73F020

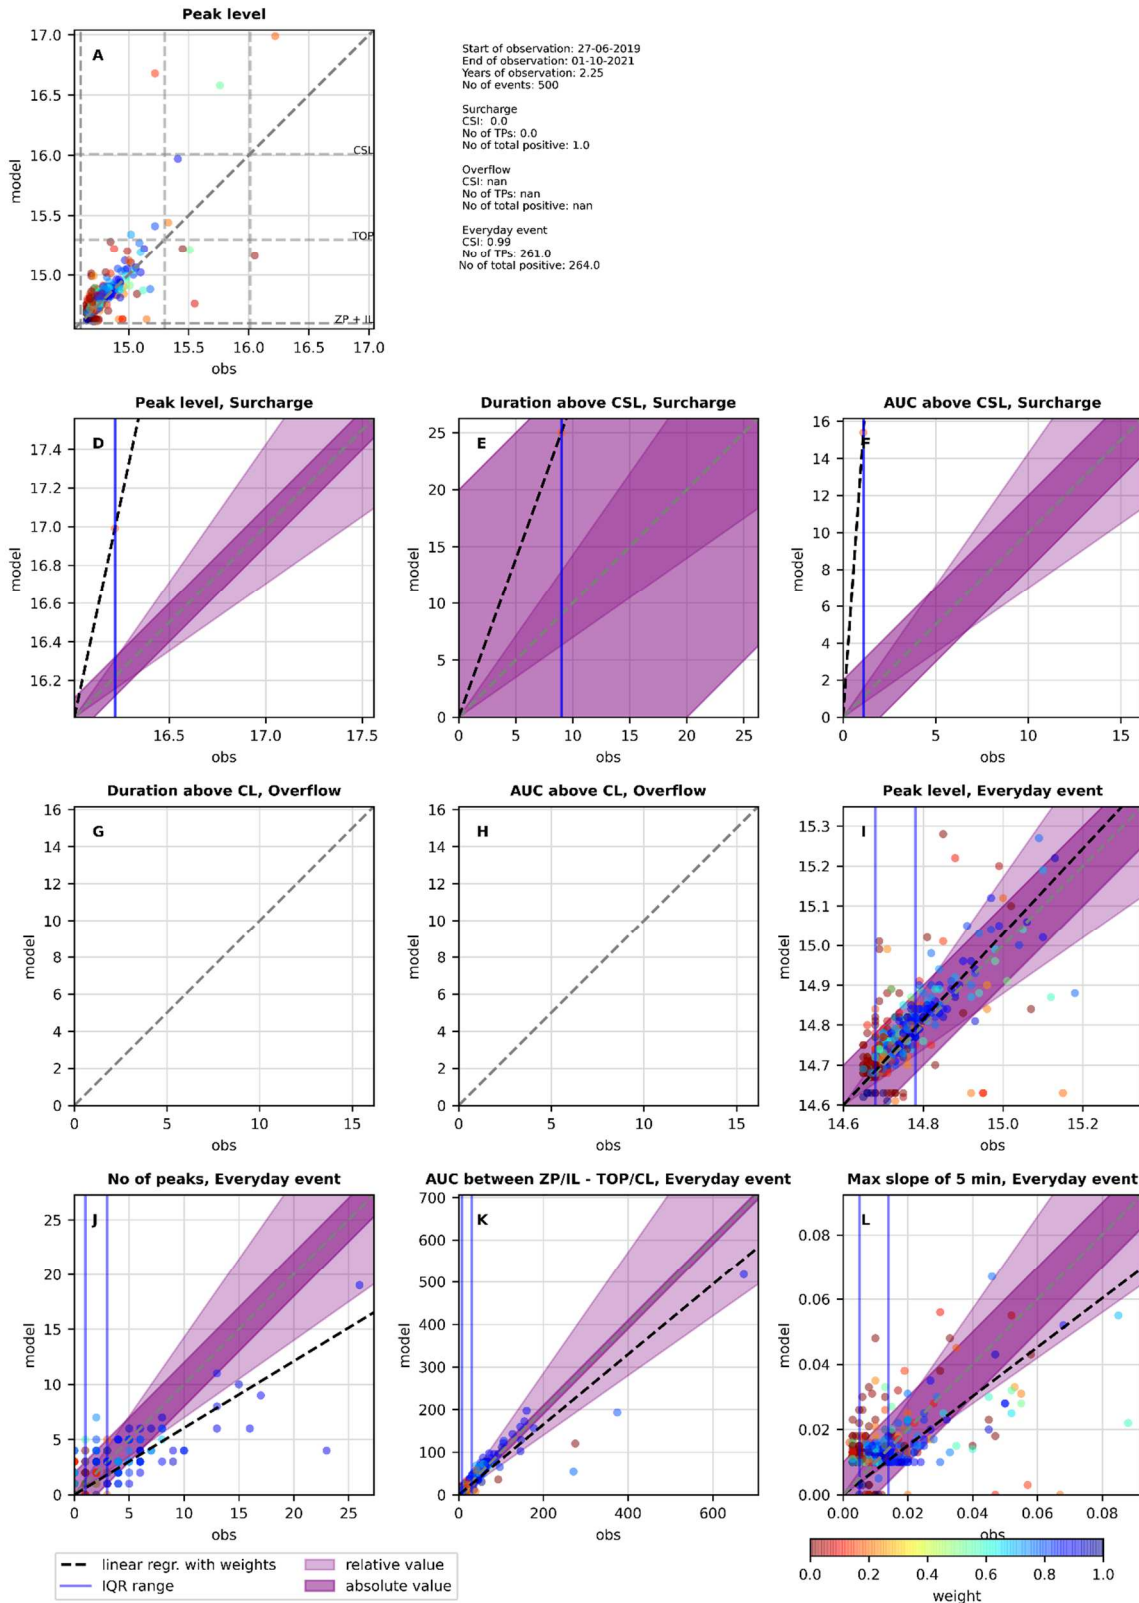

**Figure S12: Multi-event signature comparison plots for the signatures analyzing the three objectives; surcharge, overflow and everyday events.**



# Supplementary Material:

All models are wrong, but are they useful? Assessing reliability across multiple sites to build trust in urban drainage modelling  
Agnethe Nedergaard Pedersen, Annette Brink-Kjær and Peter Steen Mikkelsen

F73F038

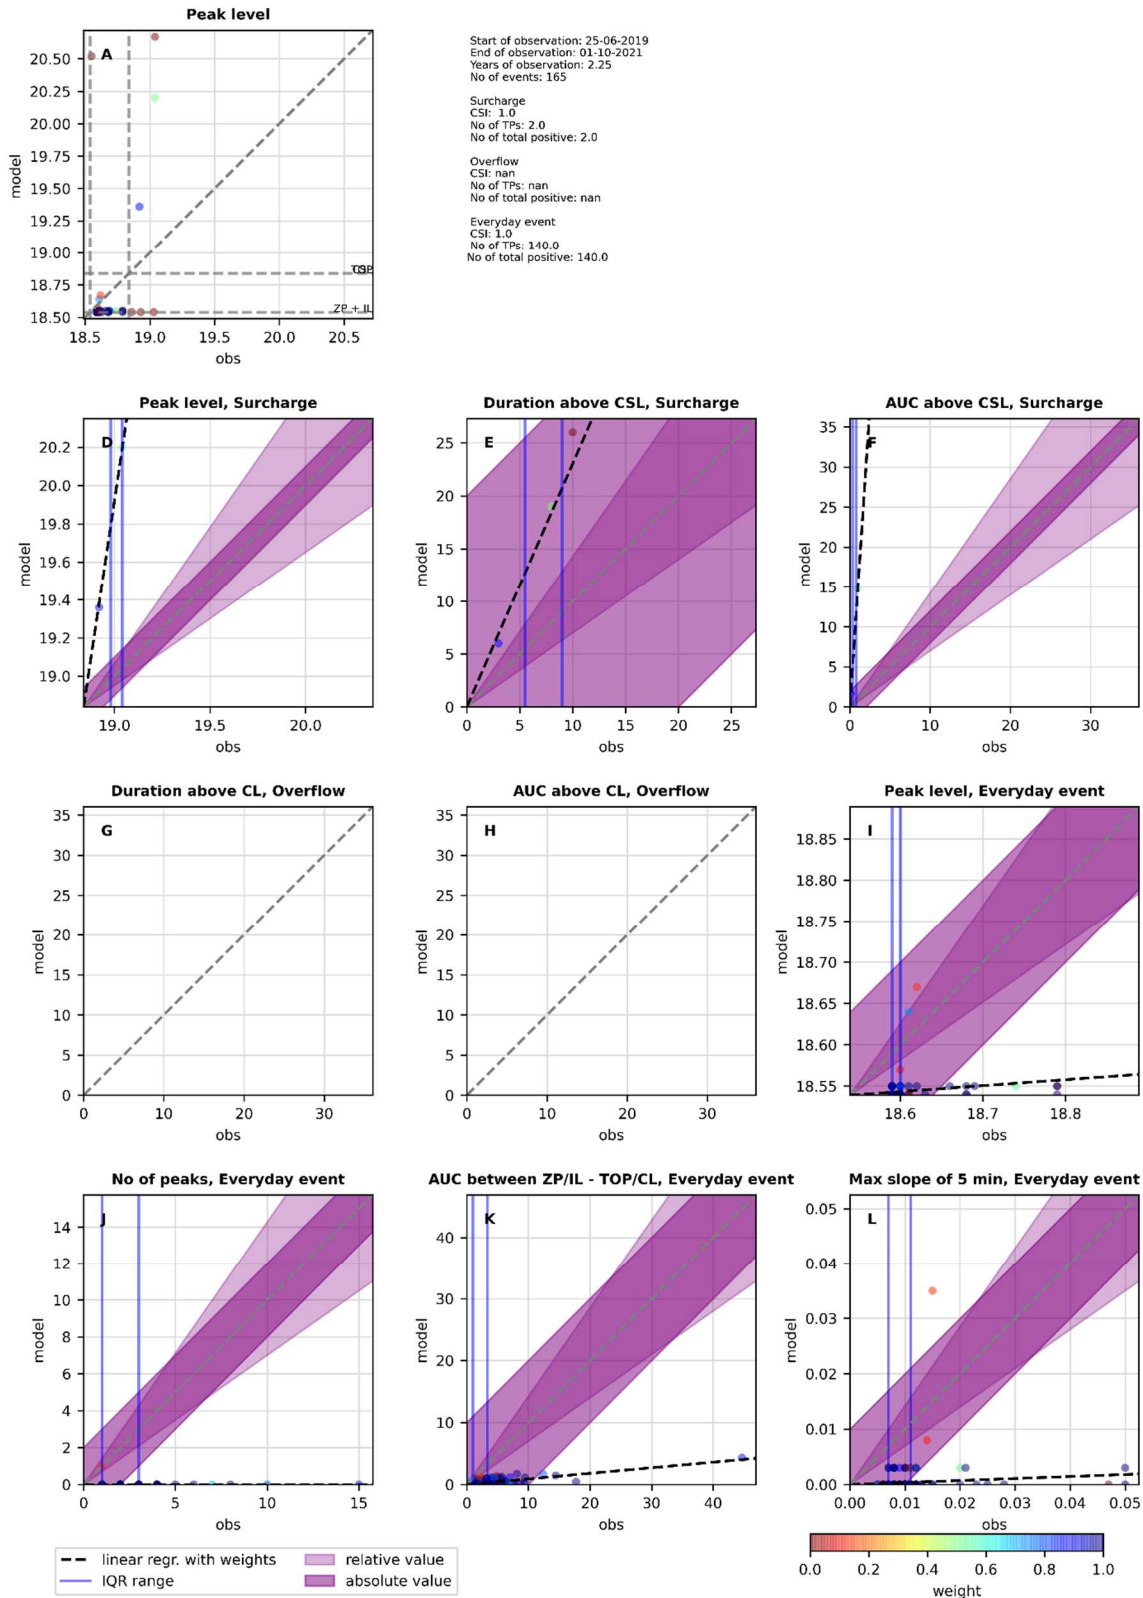

**Figure S13: Multi-event signature comparison plots for the signatures analyzing the three objectives; surcharge, overflow and everyday events.**



# Supplementary Material:

All models are wrong, but are they useful? Assessing reliability across multiple sites to build trust in urban drainage modelling  
Agnethe Nedergaard Pedersen, Annette Brink-Kjær and Peter Steen Mikkelsen

F74F040

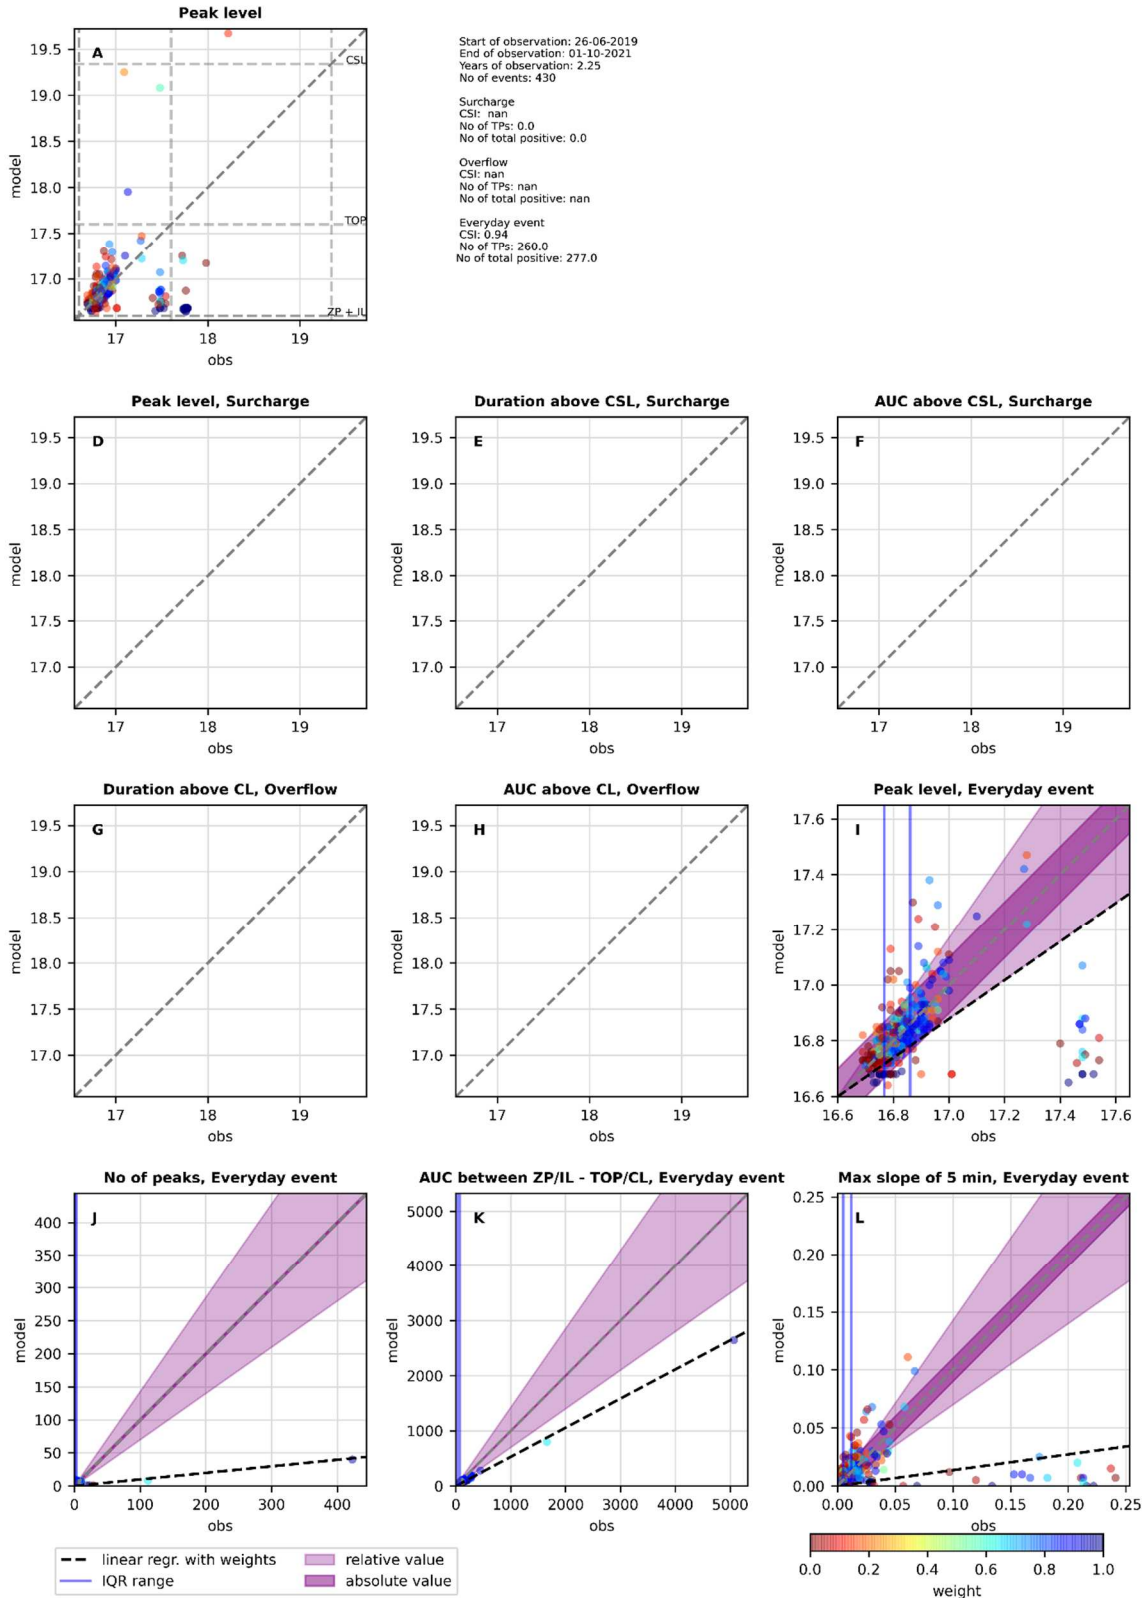

Figure S14: Multi-event signature comparison plots for the signatures analyzing the three objectives; surcharge, overflow and everyday events.

# Supplementary Material:

All models are wrong, but are they useful? Assessing reliability across multiple sites to build trust in urban drainage modelling  
Agnethe Nedergaard Pedersen, Annette Brink-Kjær and Peter Steen Mikkelsen

G71F04R\_Level1

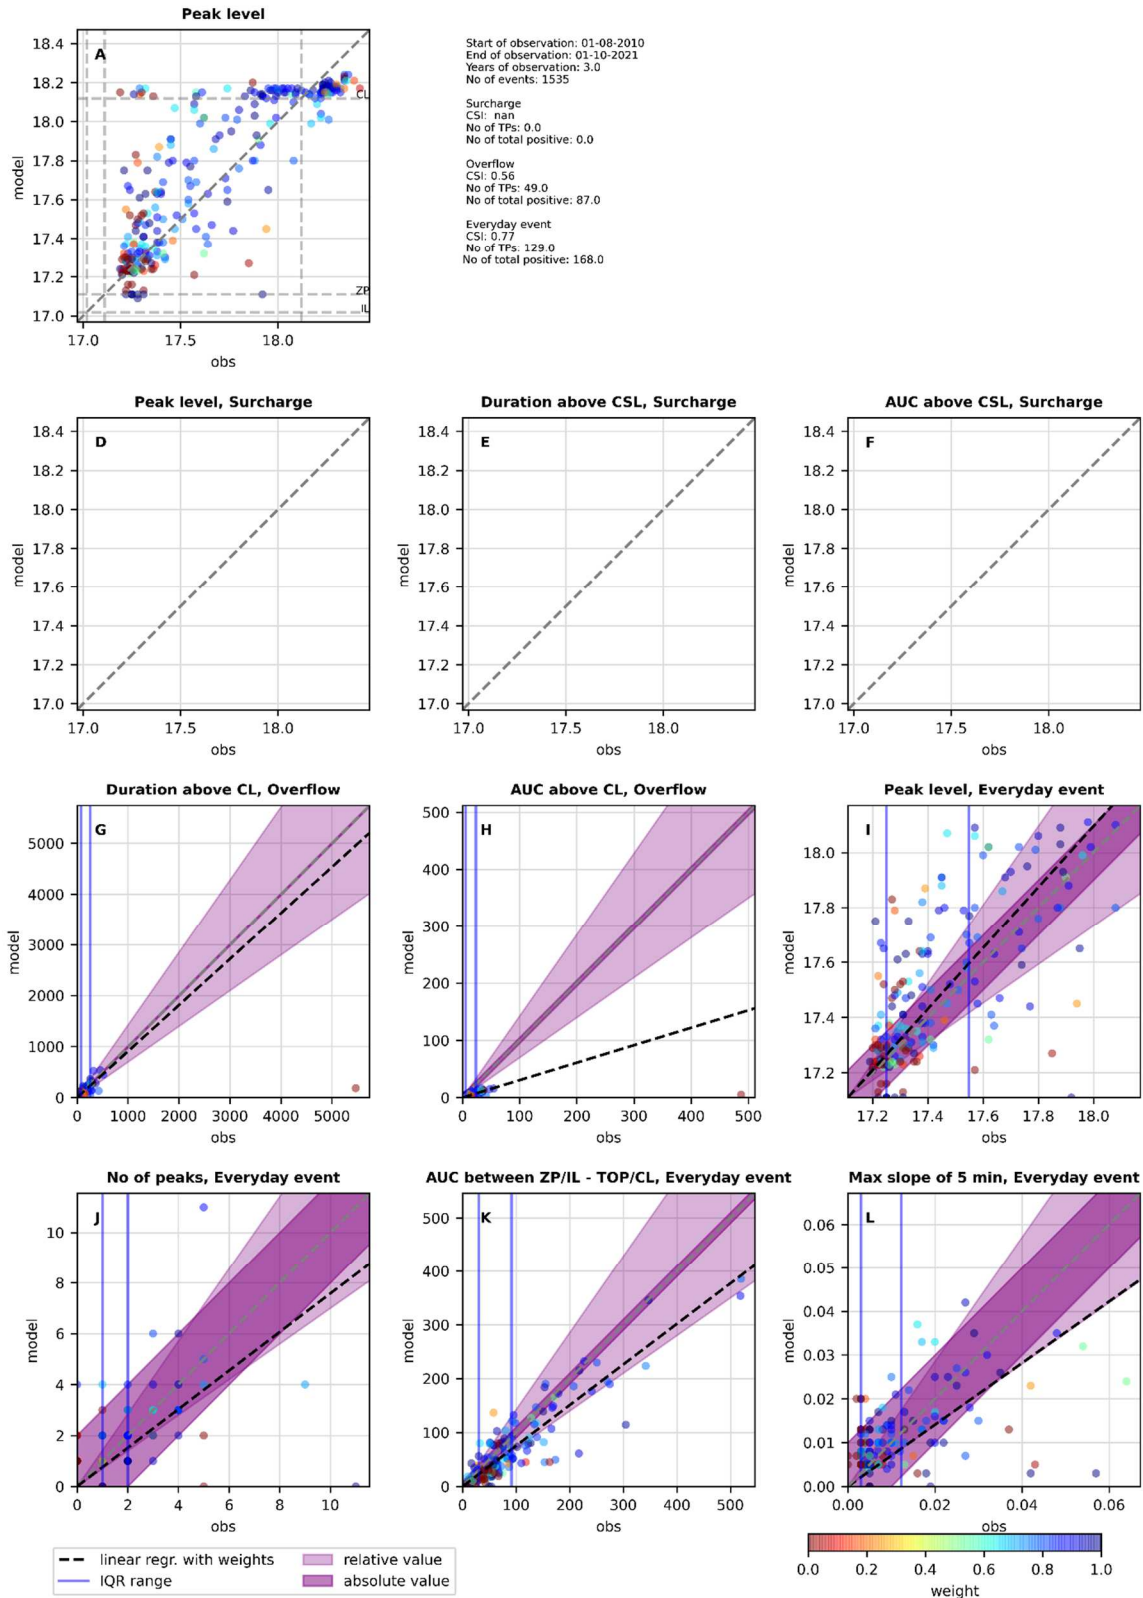

**Figure S15: Multi-event signature comparison plots for the signatures analyzing the three objectives; surcharge, overflow and everyday events.**

# Supplementary Material:

All models are wrong, but are they useful? Assessing reliability across multiple sites to build trust in urban drainage modelling  
Agnethe Nedergaard Pedersen, Annette Brink-Kjær and Peter Steen Mikkelsen

G71F05R\_LevelBasin

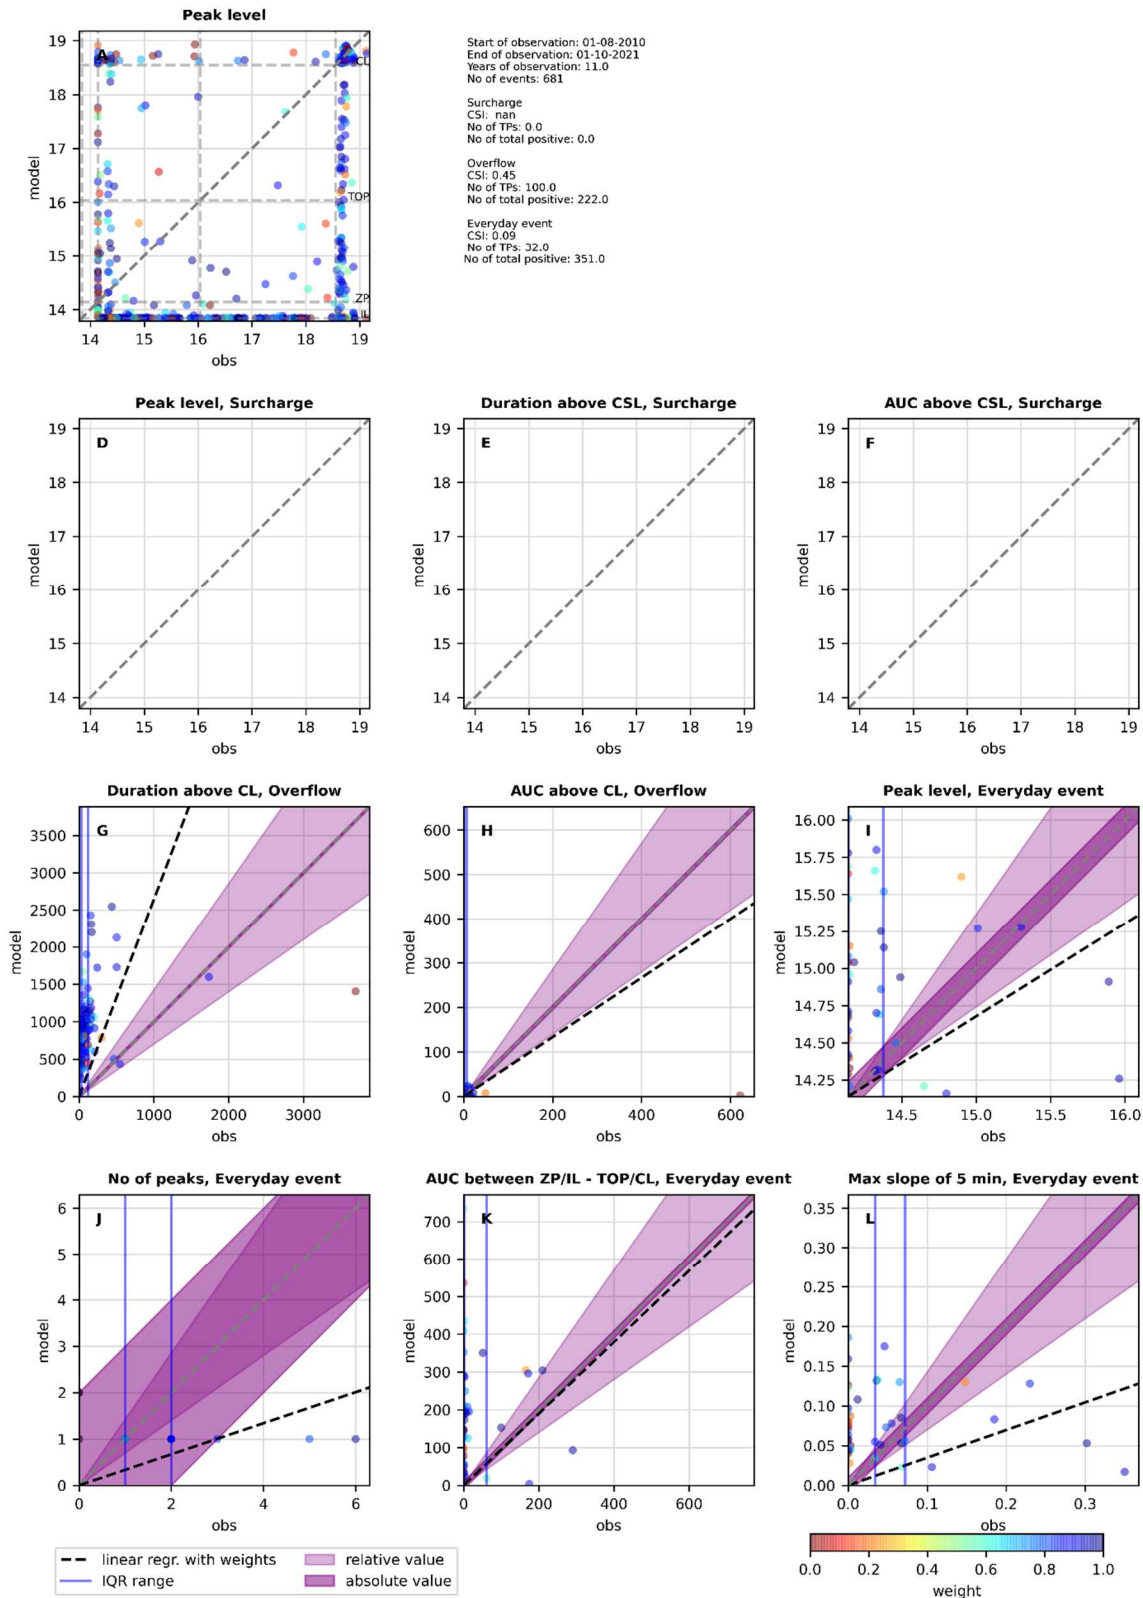

Figure S16: Multi-event signature comparison plots for the signatures analyzing the three objectives; surcharge, overflow and everyday events.

# Supplementary Material:

All models are wrong, but are they useful? Assessing reliability across multiple sites to build trust in urban drainage modelling  
Agnethe Nedergaard Pedersen, Annette Brink-Kjær and Peter Steen Mikkelsen

## G71F05R\_LevelInlet

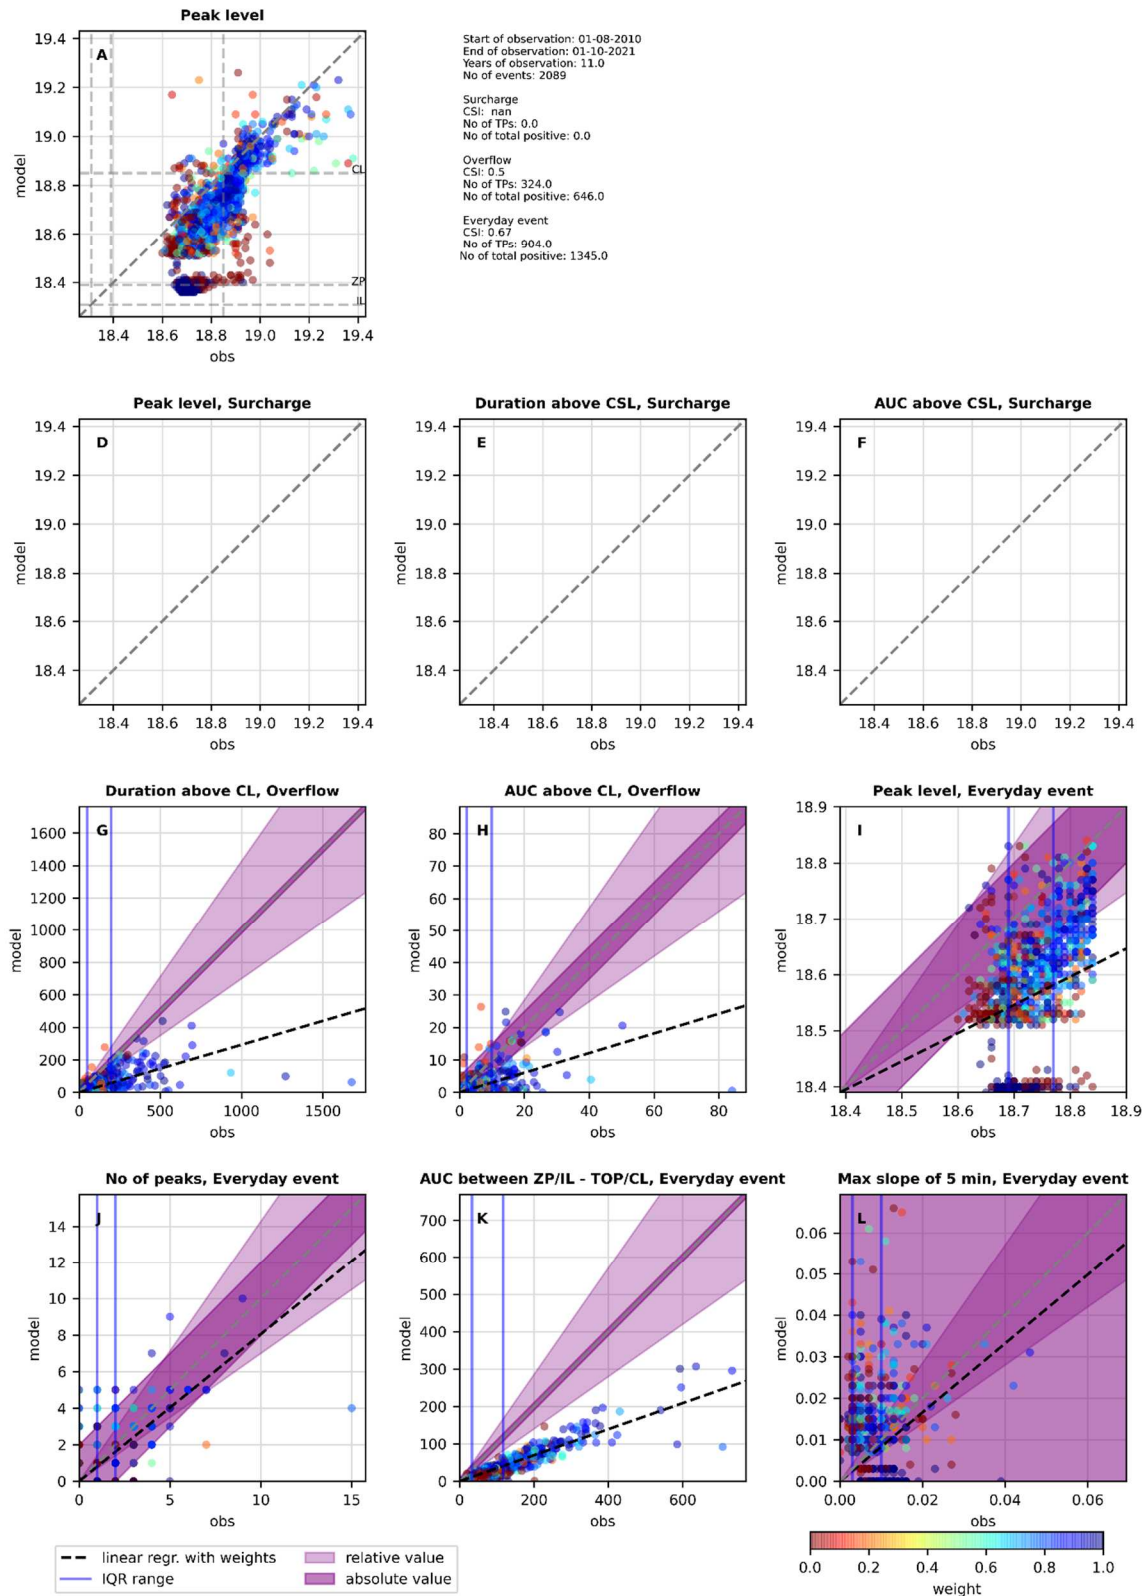

Figure S17: Multi-event signature comparison plots for the signatures analyzing the three objectives; surcharge, overflow and everyday events.



# Supplementary Material:

All models are wrong, but are they useful? Assessing reliability across multiple sites to build trust in urban drainage modelling  
Agnethe Nedergaard Pedersen, Annette Brink-Kjær and Peter Steen Mikkelsen

G71F06R\_LevelInlet

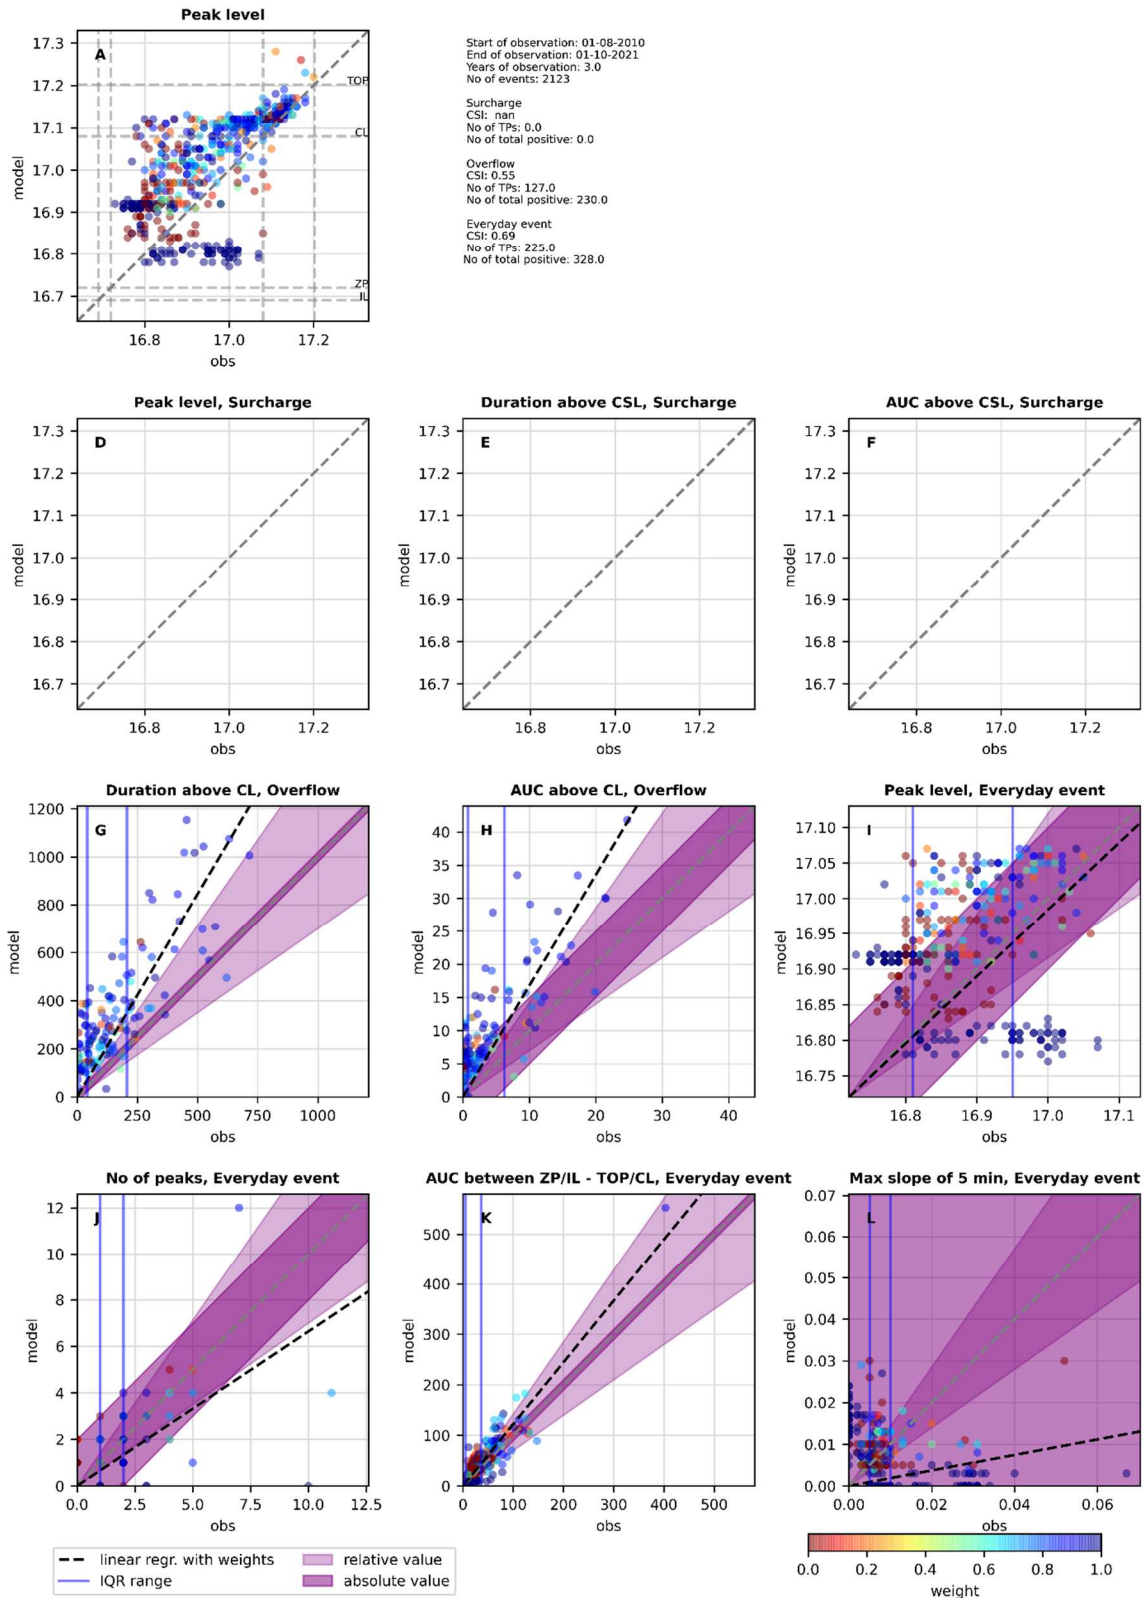

Figure S18: Multi-event signature comparison plots for the signatures analyzing the three objectives; surcharge, overflow and everyday events.



# Supplementary Material:

All models are wrong, but are they useful? Assessing reliability across multiple sites to build trust in urban drainage modelling  
Agnethe Nedergaard Pedersen, Annette Brink-Kjær and Peter Steen Mikkelsen

## G71F68Y\_LevelPS

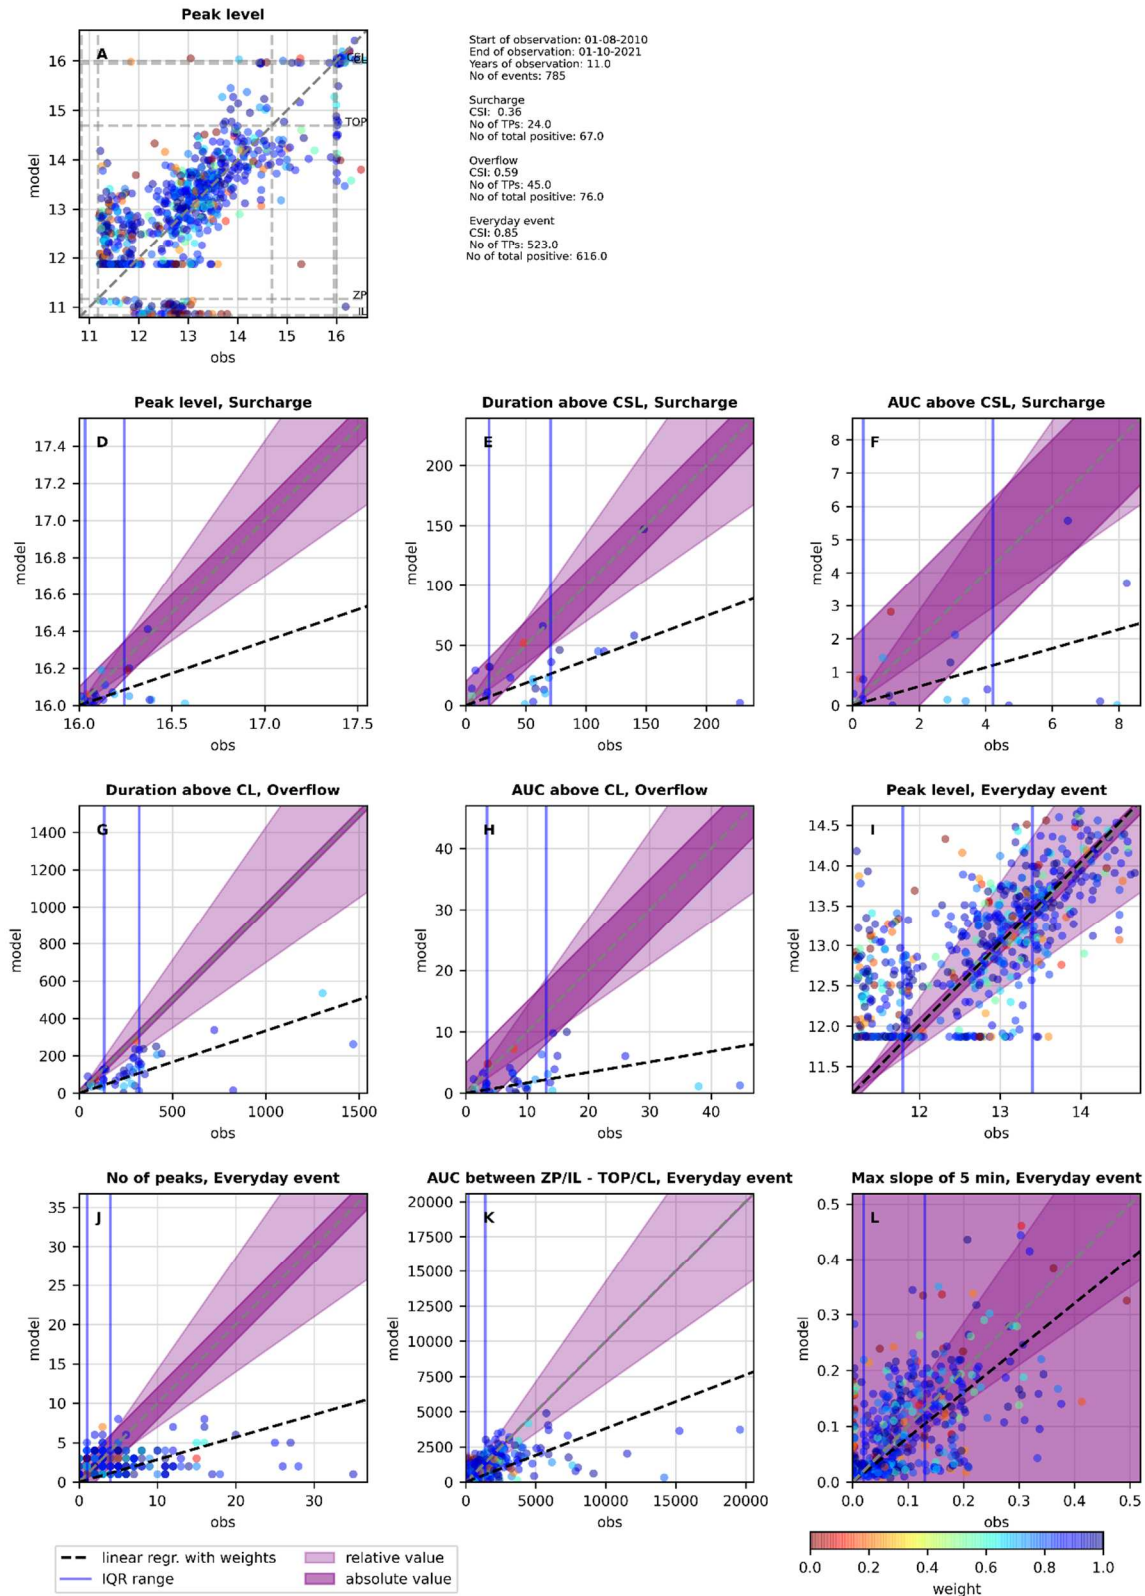

**Figure S19: Multi-event signature comparison plots for the signatures analyzing the three objectives; surcharge, overflow and everyday events.**

# Supplementary Material:

All models are wrong, but are they useful? Assessing reliability across multiple sites to build trust in urban drainage modelling  
Agnethe Nedergaard Pedersen, Annette Brink-Kjær and Peter Steen Mikkelsen

G72F040

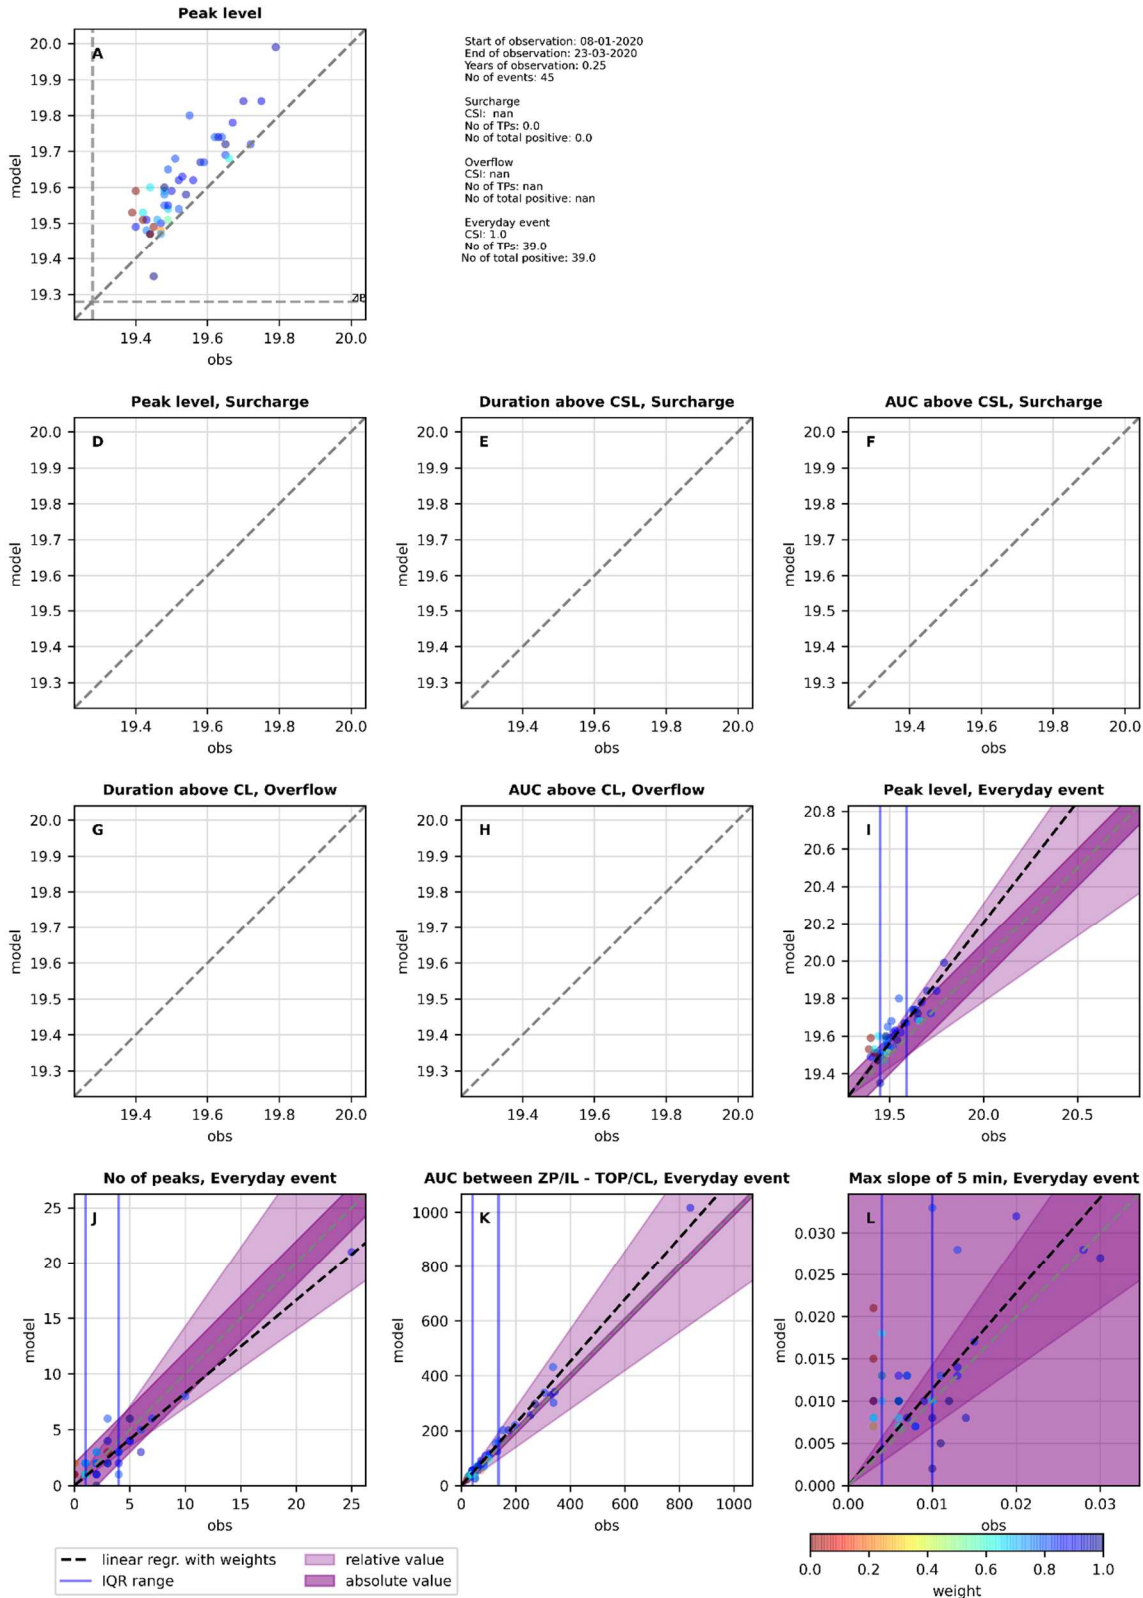

Figure S20: Multi-event signature comparison plots for the signatures analyzing the three objectives; surcharge, overflow and everyday events.

# Supplementary Material:

All models are wrong, but are they useful? Assessing reliability across multiple sites to build trust in urban drainage modelling  
Agnethe Nedergaard Pedersen, Annette Brink-Kjær and Peter Steen Mikkelsen

G73F010

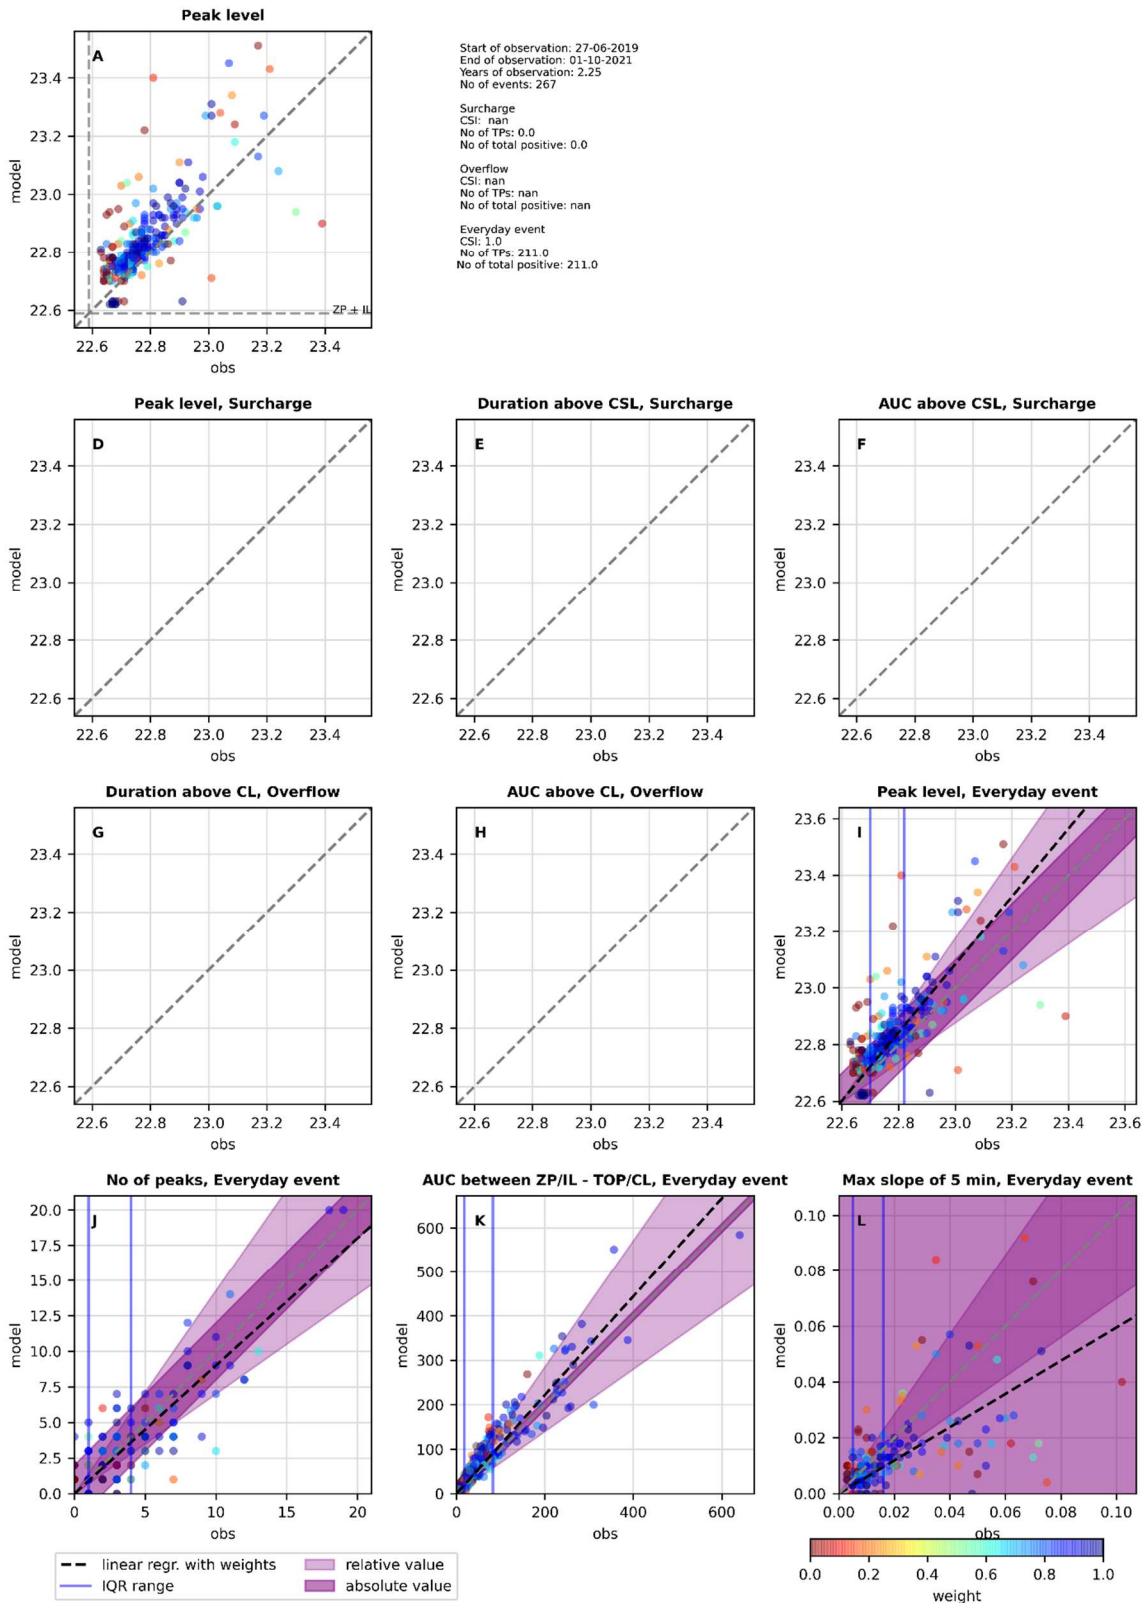

**Figure S21: Multi-event signature comparison plots for the signatures analyzing the three objectives; surcharge, overflow and everyday events.**

# Supplementary Material:

All models are wrong, but are they useful? Assessing reliability across multiple sites to build trust in urban drainage modelling  
Agnethe Nedergaard Pedersen, Annette Brink-Kjær and Peter Steen Mikkelsen

## G80F11B\_Level1

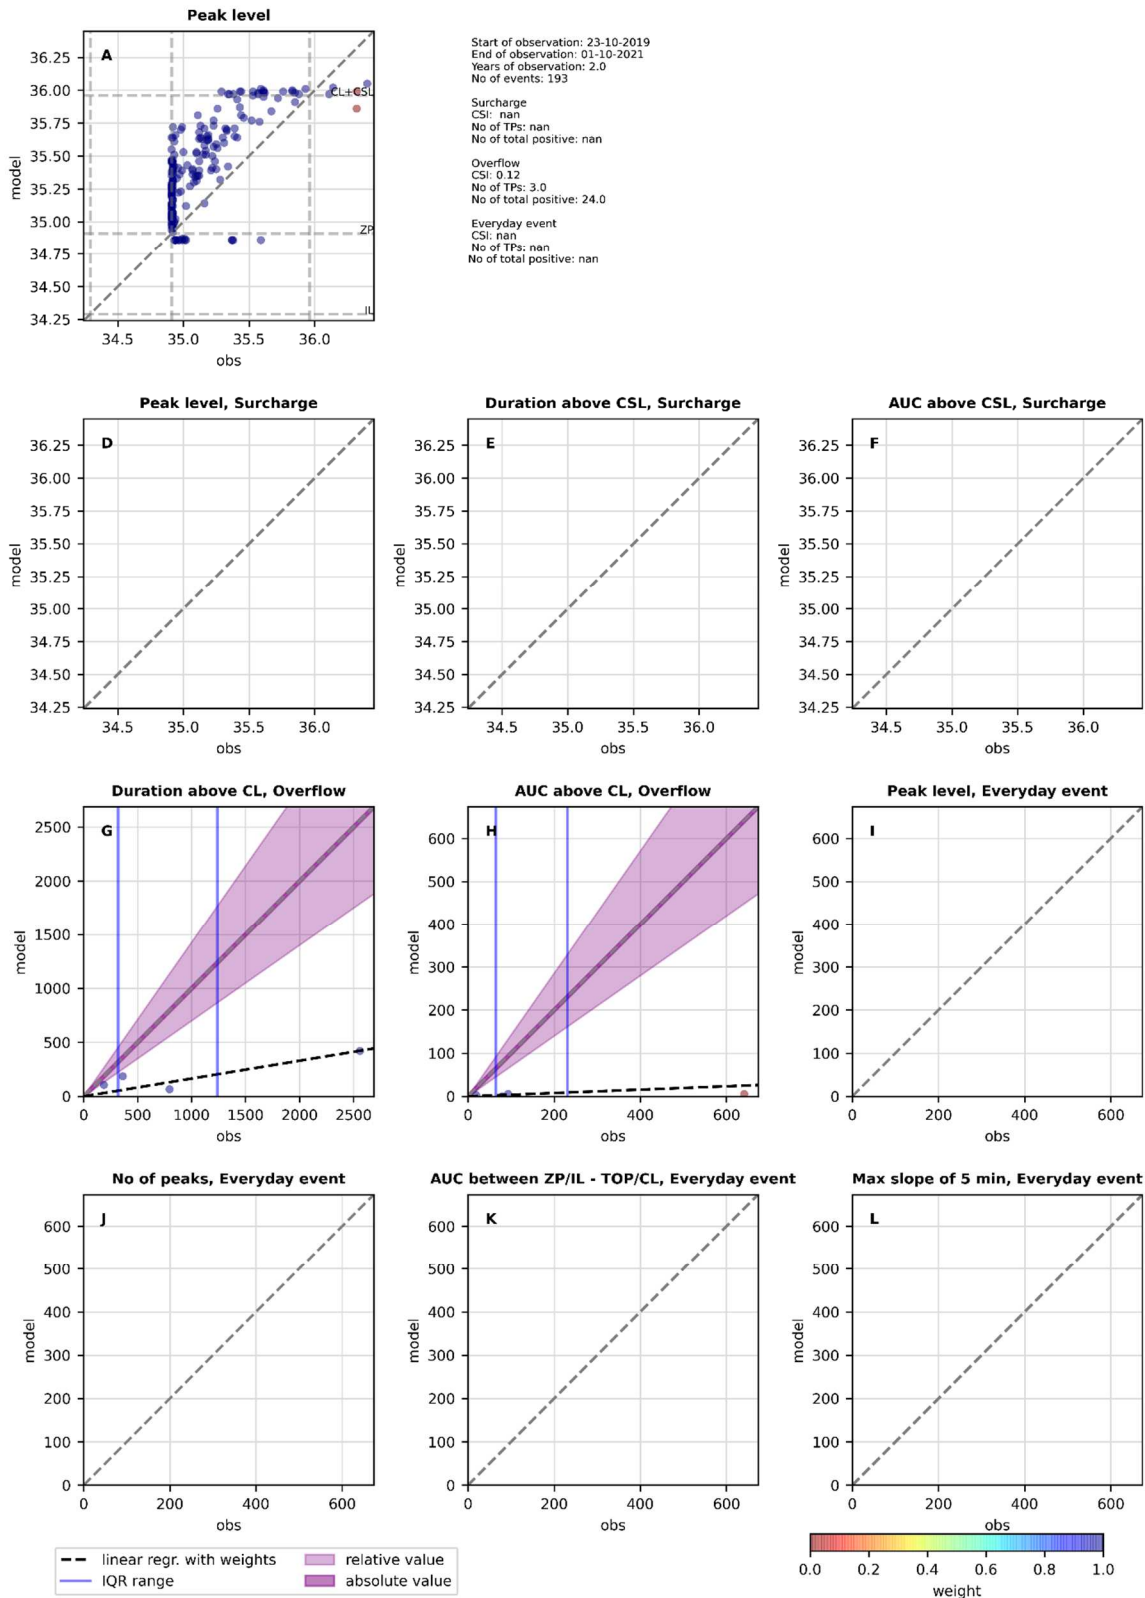

**Figure S22: Multi-event signature comparison plots for the signatures analyzing the three objectives; surcharge, overflow and everyday events.**



## Supplementary Material:

All models are wrong, but are they useful? Assessing reliability across multiple sites to build trust in urban drainage modelling  
 Agnethe Nedergaard Pedersen, Annette Brink-Kjær and Peter Steen Mikkelsen

G80F66Y\_Level1

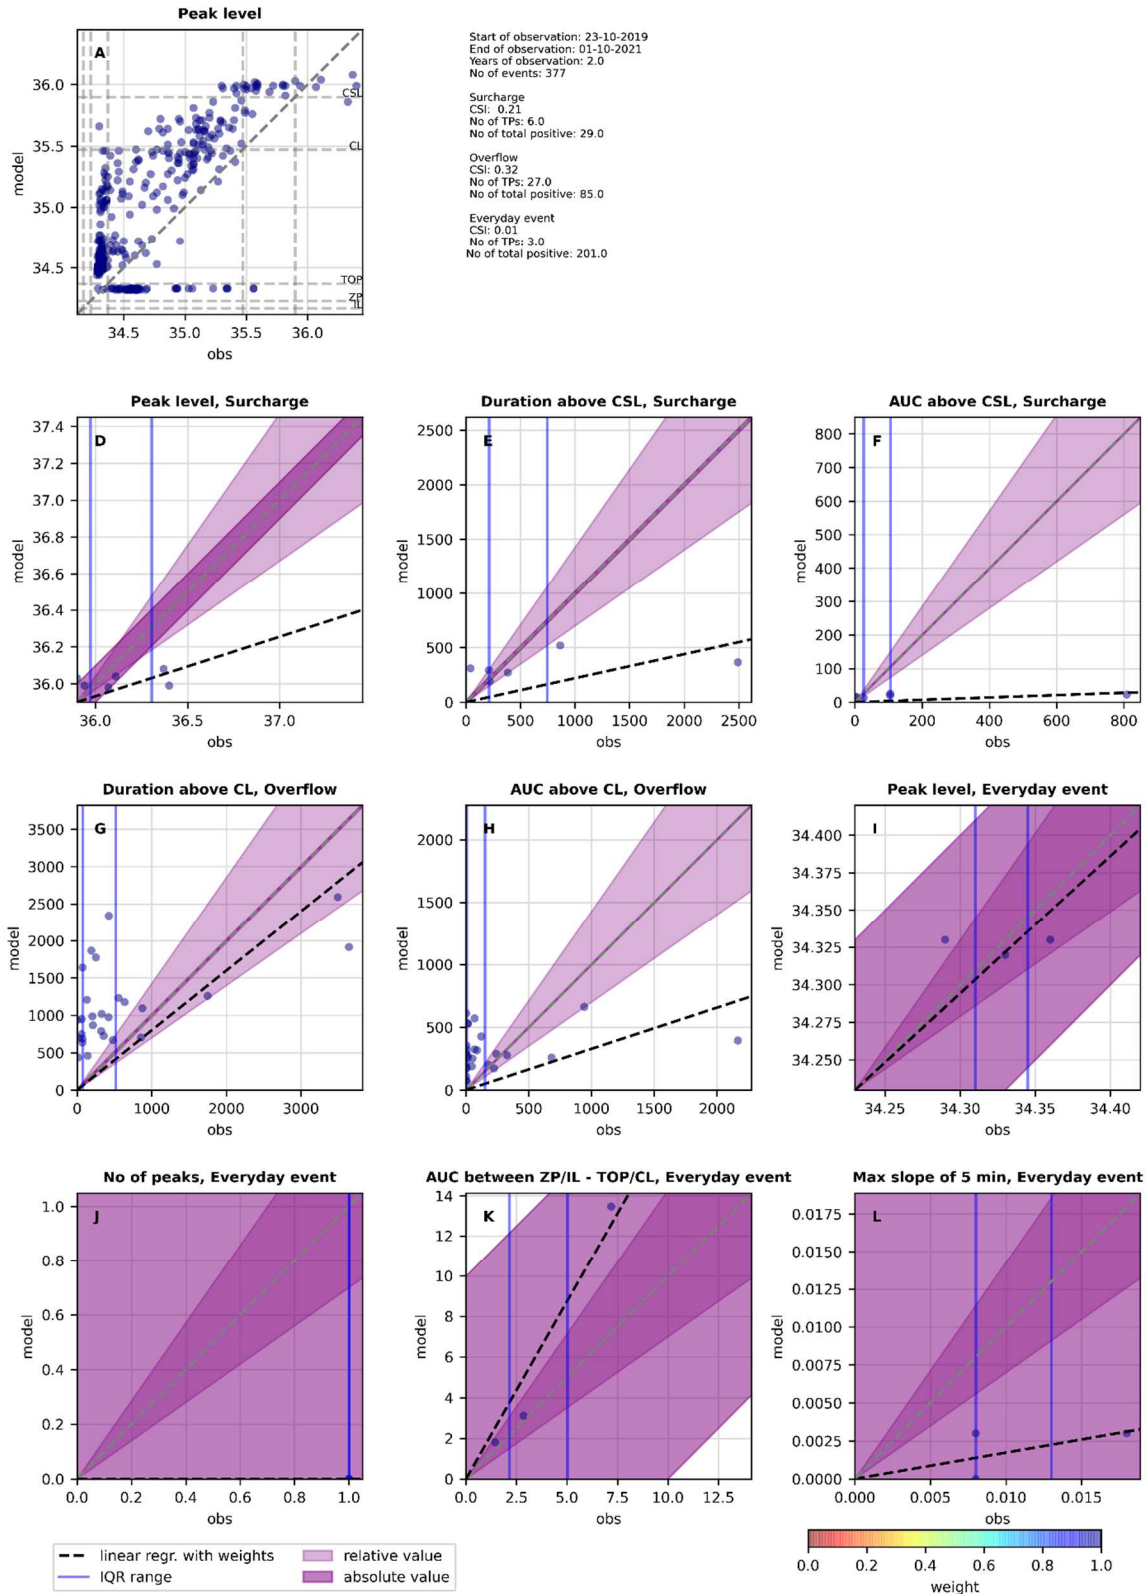

**Figure S23: Multi-event signature comparison plots for the signatures analyzing the three objectives; surcharge, overflow and everyday events.**



## Supplementary Material:

All models are wrong, but are they useful? Assessing reliability across multiple sites to build trust in urban drainage modelling  
Agnethe Nedergaard Pedersen, Annette Brink-Kjær and Peter Steen Mikkelsen

## 2. Performance score for different objectives

Table S1: Table of scores for linear regression with weighted events. The colours refer to the overall performance score; good (green), acceptable (yellow) and poor (red). The white area is where there are not enough ‘true positives’ to evaluate a score (no < 3, cf. Figure 2). The hatched areas refer to the categorical analysis, where too many events are not true positive, meaning that they are not modelled or observed. The grey/black area indicate where analysis is not possible due to physical constraints at the site, e.g. that not all sites have a crest level and evaluation of overflow is thus not possible.

Linear regression

| signature              | Years of observation | No of joint events | Surcharge     |            |                    |               |                 | Overflow     |                   |              |                | Everyday event     |            |             |                            |                    |                      |
|------------------------|----------------------|--------------------|---------------|------------|--------------------|---------------|-----------------|--------------|-------------------|--------------|----------------|--------------------|------------|-------------|----------------------------|--------------------|----------------------|
|                        |                      |                    | CSI Surcharge | Peak level | Duration above CSL | AUC above CSL | Surcharge score | CSI Overflow | Duration above CL | AUC above CL | Overflow score | CSI Everyday event | Peak level | No of peaks | AUC between Zp/IL - TOP/CL | Max slope of 5 min | Everyday event score |
| F60F44Y                | 2.25                 | 443                |               |            |                    |               |                 | 0.56         | 1.67              | 2.67         | 2.17           | 0.36               | 0.95       | 0.78        | 0.69                       | 0.66               | 0.75                 |
| F64F220                | 2.25                 | 590                |               |            |                    |               |                 |              |                   |              |                | 0.90               | 0.67       | 0.27        | 1.36                       | 0.16               | 0.62                 |
| F64F45Y                | 2.7                  | 575                |               |            |                    |               |                 |              |                   |              |                | 0.97               | 1.29       | 1.00        | 0.79                       | 0.93               | 1.00                 |
| F64F46Y                | 2.25                 | 607                | 0.39          | 3.64       | 1.16               | 3.24          | 2.68            | 0.25         | 1.53              | 1.58         | 1.55           | 0.79               | 0.82       | 0.49        | 1.00                       | 0.37               | 0.67                 |
| F67F47Y                | 2.7                  | 664                | 0.55          | 1.13       | 1.33               | 1.06          | 1.17            | 0.55         | 1.33              | 1.06         | 1.20           | 0.48               | 0.46       | 0.03        | 0.68                       | 0.10               | 0.32                 |
| F70F10R                | 11.0                 | 2246               | 0.00          |            |                    |               |                 | 0.66         | 1.04              | 1.05         | 1.04           | 0.89               | 0.83       | 0.31        | 0.85                       | 0.21               | 0.55                 |
| F70F20P_LevelBasin     | 11.0                 | 127                |               |            |                    |               |                 |              |                   |              |                | 0.10               | 1.22       | 17.09       | 0.01                       | 0.94               | 4.82                 |
| F70F20P_LevelPS        | 11.0                 | 366                |               |            |                    |               |                 |              |                   |              |                | 0.03               | 1.23       | 240.00      | 0.00                       | 0.75               | 60.50                |
| F70F70Y_LevelSump      | 11.0                 | 1302               | 0.59          | 0.73       | 0.93               | 0.50          | 0.72            | 0.59         | 0.93              | 0.50         | 0.71           | 0.02               | 2.76       | 0.03        | 0.02                       | 3.73               | 1.63                 |
| F71F10F_LevelInlet     | 11.0                 | 1756               |               |            |                    |               |                 | 0.63         | 1.21              | 0.53         | 0.87           | 0.83               | 1.10       | 1.17        | 0.34                       | 0.65               | 0.81                 |
| F71F10F_LevelPipeBasin | 11.0                 | 354                | 0.00          |            |                    |               |                 |              |                   |              |                | 0.60               | 1.11       | 0.13        | 0.02                       | 0.62               | 0.47                 |
| F73F020                | 2.25                 | 500                |               |            |                    |               |                 |              |                   |              |                | 0.99               | 1.07       | 0.60        | 0.82                       | 0.75               | 0.81                 |
| F73F038                | 2.25                 | 165                | 1.00          | 6.71       | 2.30               | 15.01         | 8.01            |              |                   |              |                | 1.00               | 0.07       | 0.00        | 0.09                       | 0.04               | 0.05                 |
| F74F040                | 2.25                 | 430                |               |            |                    |               |                 |              |                   |              |                | 0.94               | 0.70       | 0.10        | 0.53                       | 0.14               | 0.36                 |
| G71F04R_Level1         | 3.0                  | 1535               |               |            |                    |               |                 | 0.56         | 0.91              | 0.30         | 0.61           | 0.77               | 1.11       | 0.76        | 0.75                       | 0.70               | 0.83                 |
| G71F05R_LevelBasin     | 11.0                 | 681                |               |            |                    |               |                 | 0.45         | 2.64              | 0.67         | 1.65           | 0.09               | 0.63       | 0.34        | 0.95                       | 0.35               | 0.56                 |
| G71F05R_LevelInlet     | 11.0                 | 2089               |               |            |                    |               |                 | 0.50         | 0.29              | 0.30         | 0.30           | 0.67               | 0.50       | 0.81        | 0.35                       | 0.83               | 0.62                 |
| G71F06R_LevelInlet     | 3.0                  | 2123               |               |            |                    |               |                 | 0.55         | 1.69              | 1.68         | 1.68           | 0.69               | 0.94       | 0.66        | 1.22                       | 0.19               | 0.75                 |
| G71F68Y_LevelPS        | 11.0                 | 785                | 0.36          | 0.34       | 0.37               | 0.28          | 0.33            | 0.59         | 0.33              | 0.17         | 0.25           | 0.85               | 1.02       | 0.28        | 0.38                       | 0.80               | 0.62                 |
| G72F040                | 0.25                 | 45                 |               |            |                    |               |                 |              |                   |              |                | 1.00               | 1.29       | 0.83        | 1.13                       | 1.14               | 1.10                 |
| G73F010                | 2.25                 | 267                |               |            |                    |               |                 |              |                   |              |                | 1.00               | 1.20       | 0.90        | 1.11                       | 0.59               | 0.95                 |
| G80F11B_Level1         | 2.0                  | 193                |               |            |                    |               |                 | 0.12         | 0.17              | 0.04         | 0.10           |                    |            |             |                            |                    |                      |
| G80F66Y_Level1         | 2.0                  | 377                | 0.21          | 0.32       | 0.22               | 0.04          | 0.19            | 0.32         | 0.80              | 0.33         | 0.56           | 0.01               | 0.92       | -0.00       | 1.75                       | 0.17               | 0.71                 |

# Supplementary Material:

All models are wrong, but are they useful? Assessing reliability across multiple sites to build trust in urban drainage modelling  
Agnethe Nedergaard Pedersen, Annette Brink-Kjær and Peter Steen Mikkelsen

**Table S2: Table of scores for indicator function with weighted events. The colours refer to the overall performance score; good (green), acceptable (yellow) and poor (red). The white area is where there are not enough ‘true positives’ to evaluate a score (no<3, cf. Figure 2). The hatched areas refer to the categorical analysis, where too many events are not true positive, meaning that they are not modelled or observed. The grey/black area indicate where analysis is not possible due to physical constraints at the site, e.g. that not all sites have a crest level and evaluation of overflow is thus not possible**

Indicator function

| signature              | Years of observation | No of joint events | Surcharge     |            |                    |               |                 | Overflow     |                   |              |                | Everyday event     |            |             |                            |                    |                      |
|------------------------|----------------------|--------------------|---------------|------------|--------------------|---------------|-----------------|--------------|-------------------|--------------|----------------|--------------------|------------|-------------|----------------------------|--------------------|----------------------|
|                        |                      |                    | CSI Surcharge | Peak level | Duration above CSL | AUC above CSL | Surcharge score | CSI Overflow | Duration above CL | AUC above CL | Overflow score | CSI Everyday event | Peak level | No of peaks | AUC between ZP/IL - TOP/CL | Max slope of 5 min | Everyday event score |
| F60F44Y                | 2.25                 | 443                |               |            |                    |               |                 | 0.56         | 0.20              | 0.23         | 0.22           | 0.36               | 0.73       | 0.82        | 0.67                       | 0.97               | 0.80                 |
| F64F220                | 2.25                 | 590                |               |            |                    |               |                 |              |                   |              |                | 0.90               | 0.64       | 0.61        | 0.73                       | 0.40               | 0.60                 |
| F64F45Y                | 2.7                  | 575                |               |            |                    |               |                 |              |                   |              |                | 0.97               | 0.83       | 0.79        | 0.65                       | 0.85               | 0.78                 |
| F64F46Y                | 2.25                 | 607                | 0.39          | 0.53       | 0.98               | 0.76          | 0.75            | 0.25         | 0.69              | 0.99         | 0.84           | 0.79               | 0.88       | 0.81        | 0.95                       | 0.70               | 0.83                 |
| F67F47Y                | 2.7                  | 664                | 0.55          | 0.77       | 0.68               | 0.77          | 0.74            | 0.55         | 0.68              | 0.88         | 0.78           | 0.48               | 0.34       | 0.49        | 0.83                       | 0.33               | 0.50                 |
| F70F10R                | 11.0                 | 2246               | 0.00          |            |                    |               |                 | 0.66         | 0.58              | 0.60         | 0.59           | 0.89               | 0.58       | 0.80        | 0.75                       | 0.63               | 0.69                 |
| F70F20P_LevelBasin     | 11.0                 | 127                |               |            |                    |               |                 |              |                   |              |                | 0.10               | 0.43       | 0.35        | 0.00                       | 0.25               | 0.26                 |
| F70F20P_LevelPS        | 11.0                 | 366                |               |            |                    |               |                 |              |                   |              |                | 0.03               | 0.73       | 0.47        | 0.23                       | 0.26               | 0.42                 |
| F70F70Y_LevelSump      | 11.0                 | 1302               | 0.59          | 0.72       | 0.32               | 0.54          | 0.53            | 0.59         | 0.32              | 0.74         | 0.53           | 0.02               | 0.37       | 0.46        | 0.69                       | 0.00               | 0.38                 |
| F71F10F_LevelInlet     | 11.0                 | 1756               |               |            |                    |               |                 | 0.63         | 0.79              | 0.81         | 0.80           | 0.83               | 0.82       | 0.75        | 0.34                       | 0.84               | 0.69                 |
| F71F10F_LevelPipeBasin | 11.0                 | 354                | 0.00          |            |                    |               |                 |              |                   |              |                | 0.60               | 0.23       | 0.71        | 0.12                       | 0.29               | 0.34                 |
| F73F020                | 2.25                 | 500                |               |            |                    |               |                 |              |                   |              |                | 0.99               | 0.96       | 0.75        | 0.93                       | 0.90               | 0.89                 |
| F73F038                | 2.25                 | 165                | 1.00          | 0.00       | 1.00               | 0.64          | 0.55            |              |                   |              |                | 1.00               | 0.94       | 0.79        | 0.97                       | 0.63               | 0.84                 |
| F74F040                | 2.25                 | 430                |               |            |                    |               |                 |              |                   |              |                | 0.94               | 0.90       | 0.79        | 0.63                       | 0.86               | 0.80                 |
| G71F04R_Level1         | 3.0                  | 1535               |               |            |                    |               |                 | 0.56         | 0.63              | 0.41         | 0.52           | 0.77               | 0.55       | 0.92        | 0.54                       | 0.86               | 0.72                 |
| G71F05R_LevelBasin     | 11.0                 | 681                |               |            |                    |               |                 | 0.45         | 0.03              | 0.77         | 0.40           | 0.09               | 0.18       | 0.83        | 0.03                       | 0.20               | 0.31                 |
| G71F05R_LevelInlet     | 11.0                 | 2089               |               |            |                    |               |                 | 0.50         | 0.30              | 0.67         | 0.49           | 0.67               | 0.27       | 0.91        | 0.24                       | 1.00               | 0.60                 |
| G71F06R_LevelInlet     | 3.0                  | 2123               |               |            |                    |               |                 | 0.55         | 0.16              | 0.58         | 0.37           | 0.69               | 0.41       | 0.96        | 0.65                       | 1.00               | 0.76                 |
| G71F68Y_LevelPS        | 11.0                 | 785                | 0.36          | 0.77       | 0.39               | 0.66          | 0.61            | 0.59         | 0.18              | 0.44         | 0.31           | 0.85               | 0.59       | 0.68        | 0.35                       | 1.00               | 0.66                 |
| G72F040                | 0.25                 | 45                 |               |            |                    |               |                 |              |                   |              |                | 1.00               | 0.83       | 0.86        | 0.95                       | 1.00               | 0.91                 |
| G73F010                | 2.25                 | 267                |               |            |                    |               |                 |              |                   |              |                | 1.00               | 0.82       | 0.83        | 0.62                       | 1.00               | 0.82                 |
| G80F11B_Level1         | 2.0                  | 193                |               |            |                    |               |                 | 0.12         | 0.00              | 0.00         | 0.00           |                    |            |             |                            |                    |                      |
| G80F66Y_Level1         | 2.0                  | 377                | 0.21          | 0.50       | 0.50               | 0.00          | 0.33            | 0.32         | 0.19              | 0.19         | 0.19           | 0.01               | 1.00       | 1.00        | 1.00                       | 1.00               | 1.00                 |

# Supplementary Material:

All models are wrong, but are they useful? Assessing reliability across multiple sites to build trust in urban drainage modelling  
Agnethe Nedergaard Pedersen, Annette Brink-Kjær and Peter Steen Mikkelsen

**Table S3: Table of scores for the normalized RMSE with weighted events. The colours refer to the overall performance score; good (green), acceptable (yellow) and poor (red). The white area is where there are not enough ‘true positives’ to evaluate a score (no<3, cf. Figure 2). The hatched areas refer to the categorical analysis, where too many events are not true positive, meaning that they are not modelled or observed. The grey/black area indicate where analysis is not possible due to physical constraints at the site, e.g. that not all sites have a crest level and evaluation of overflow is thus not possible**

## Normalised RMSE

| signature              | Years of observation | No of joint events | Surcharge     |            |                    |               |                 | Overflow     |                   |              |                | Everyday event     |            |             |                            |                    |                      |
|------------------------|----------------------|--------------------|---------------|------------|--------------------|---------------|-----------------|--------------|-------------------|--------------|----------------|--------------------|------------|-------------|----------------------------|--------------------|----------------------|
|                        |                      |                    | CSI Surcharge | Peak level | Duration above CSL | AUC above CSL | Surcharge score | CSI Overflow | Duration above CL | AUC above CL | Overflow score | CSI Everyday event | Peak level | No of peaks | AUC between Zp/IL - TOP/CL | Max slope of 5 min | Everyday event score |
| F60F44Y                | 2.25                 | 443                |               |            |                    |               |                 | 0.56         | 1.47              | 2.12         | 1.79           | 0.36               | 1.17       | 1.22        | 0.76                       | 1.84               | 1.25                 |
| F64F220                | 2.25                 | 590                |               |            |                    |               |                 |              |                   |              |                | 0.90               | 1.26       | 1.35        | 0.60                       | 1.24               | 1.11                 |
| F64F45Y                | 2.7                  | 575                |               |            |                    |               |                 |              |                   |              |                | 0.97               | 0.76       | 0.73        | 0.56                       | 1.26               | 0.83                 |
| F64F46Y                | 2.25                 | 607                | 0.39          | 4.60       | 0.81               | 21.68         | 9.03            | 0.25         | 1.43              | 3.97         | 2.70           | 0.79               | 1.01       | 0.99        | 0.48                       | 1.10               | 0.90                 |
| F67F47Y                | 2.7                  | 664                | 0.55          | 1.75       | 1.15               | 3.62          | 2.17            | 0.55         | 1.15              | 3.62         | 2.38           | 0.48               | 2.10       | 1.28        | 1.07                       | 1.12               | 1.39                 |
| F70F10R                | 11.0                 | 2246               | 0.00          |            |                    |               |                 | 0.66         | 0.94              | 0.79         | 0.86           | 0.89               | 0.77       | 1.15        | 0.60                       | 1.12               | 0.91                 |
| F70F20P_LevelBasin     | 11.0                 | 127                |               |            |                    |               |                 |              |                   |              |                | 0.10               | 3.89       | 15.58       | 1.03                       | 1.88               | 5.59                 |
| F70F20P_LevelPS        | 11.0                 | 366                |               |            |                    |               |                 |              |                   |              |                | 0.03               | 2.28       | inf         | 0.90                       | 0.69               | inf                  |
| F70F70Y_LevelSump      | 11.0                 | 1302               | 0.59          | 0.59       | 21.59              | 12.82         | 11.67           | 0.59         | 21.59             | 12.82        | 17.20          | 0.02               | 5.46       | 0.82        | 4.89                       | 13.40              | 6.14                 |
| F71F10F_LevelInlet     | 11.0                 | 1756               |               |            |                    |               |                 | 0.63         | 0.70              | 0.59         | 0.65           | 0.83               | 1.00       | 1.44        | 1.17                       | 1.76               | 1.34                 |
| F71F10F_LevelPipeBasin | 11.0                 | 354                | 0.00          |            |                    |               |                 |              |                   |              |                | 0.60               | 0.87       | 1.93        | 3.24                       | 0.96               | 1.75                 |
| F73F020                | 2.25                 | 500                |               |            |                    |               |                 |              |                   |              |                | 0.99               | 0.75       | 0.92        | 0.79                       | 1.13               | 0.90                 |
| F73F038                | 2.25                 | 165                | 1.00          | 19.71      | 3.24               | 21.95         | 14.97           |              |                   |              |                | 1.00               | 6.72       | 1.06        | 1.98                       | 2.96               | 3.18                 |
| F74F040                | 2.25                 | 430                |               |            |                    |               |                 |              |                   |              |                | 0.94               | 1.77       | 9.89        | 2.56                       | 5.30               | 4.88                 |
| G71F04R_Level1         | 3.0                  | 1535               |               |            |                    |               |                 | 0.56         | 3.92              | 3.73         | 3.83           | 0.77               | 0.73       | 1.41        | 0.66                       | 1.04               | 0.96                 |
| G71F05R_LevelBasin     | 11.0                 | 681                |               |            |                    |               |                 | 0.45         | 10.47             | 12.96        | 11.71          | 0.09               | 2.61       | 1.39        | 3.83                       | 2.64               | 2.62                 |
| G71F05R_LevelInlet     | 11.0                 | 2089               |               |            |                    |               |                 | 0.50         | 1.15              | 1.09         | 1.12           | 0.67               | 2.39       | 1.04        | 0.96                       | 1.51               | 1.48                 |
| G71F06R_LevelInlet     | 3.0                  | 2123               |               |            |                    |               |                 | 0.55         | 1.38              | 1.33         | 1.35           | 0.69               | 0.86       | 1.07        | 0.66                       | 2.57               | 1.29                 |
| G71F68Y_LevelPS        | 11.0                 | 785                | 0.36          | 0.79       | 1.13               | 0.77          | 0.90            | 0.59         | 1.50              | 1.20         | 1.35           | 0.85               | 0.47       | 1.23        | 1.24                       | 0.66               | 0.90                 |
| G72F040                | 0.25                 | 45                 |               |            |                    |               |                 |              |                   |              |                | 1.00               | 0.73       | 0.45        | 0.36                       | 1.19               | 0.68                 |
| G73F010                | 2.25                 | 267                |               |            |                    |               |                 |              |                   |              |                | 1.00               | 0.99       | 0.50        | 0.53                       | 1.20               | 0.80                 |
| G80F11B_Level1         | 2.0                  | 193                |               |            |                    |               |                 | 0.12         | 1.24              | 1.95         | 1.59           |                    |            |             |                            |                    |                      |
| G80F66Y_Level1         | 2.0                  | 377                | 0.21          | 0.73       | 1.67               | 4.11          | 2.17            | 0.32         | 2.08              | 3.07         | 2.58           | 0.01               | 0.84       | inf         | 1.26                       | 2.05               | inf                  |



### 3. Maps of the different objectives for the method linear regression

#### Surcharge

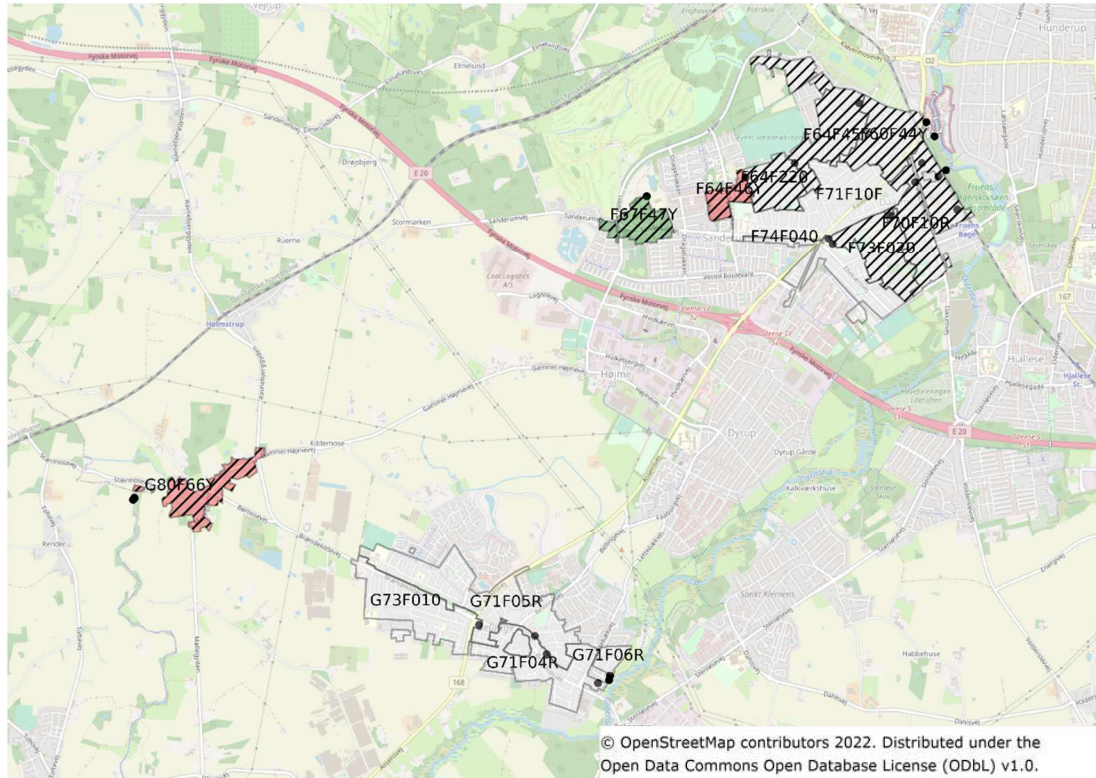

**Figure S24:** Map of the performance for surcharge using the method of linear regression. The upstream catchment area of the site is mapped, and the naming in the catchment refers to the overflow structure that is mapped. The catchment area represents the case areas. The urban areas in between the catchment areas are not connected to the case areas, as they have a separate stormwater system. Background map is from OpenStreetMap (2022).



### Supplementary Material:

All models are wrong, but are they useful? Assessing reliability across multiple sites to build trust in urban drainage modelling  
Agnethe Nedergaard Pedersen, Annette Brink-Kjær and Peter Steen Mikkelsen

#### Overflow

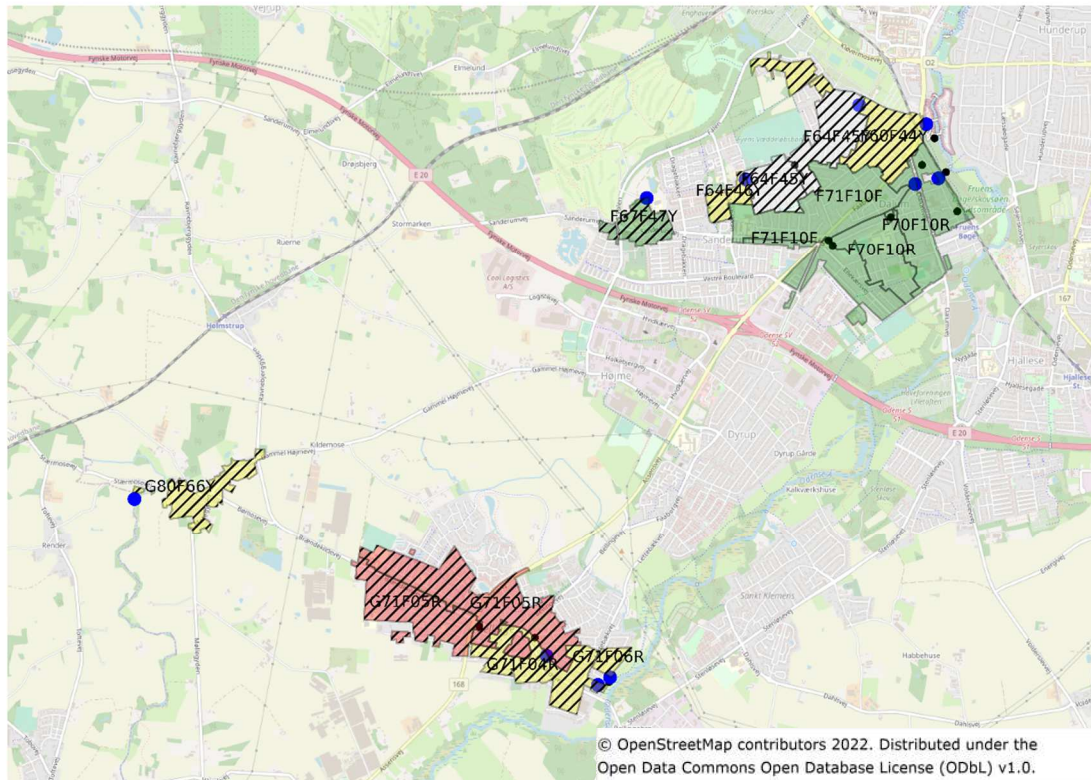

**Figure S25:** Map of the performance for overflow using the method of linear regression. The upstream catchment area of the site is mapped, and the naming in the catchment refers to the overflow structure that is mapped. The catchment area represents the case areas. The urban areas in between the catchment areas are not connected to the case areas, as they have a separate stormwater system. Background map is from OpenStreetMap (2022).

## Supplementary Material:

All models are wrong, but are they useful? Assessing reliability across multiple sites to build trust in urban drainage modelling  
Agnethe Nedergaard Pedersen, Annette Brink-Kjær and Peter Steen Mikkelsen

### Daily rain

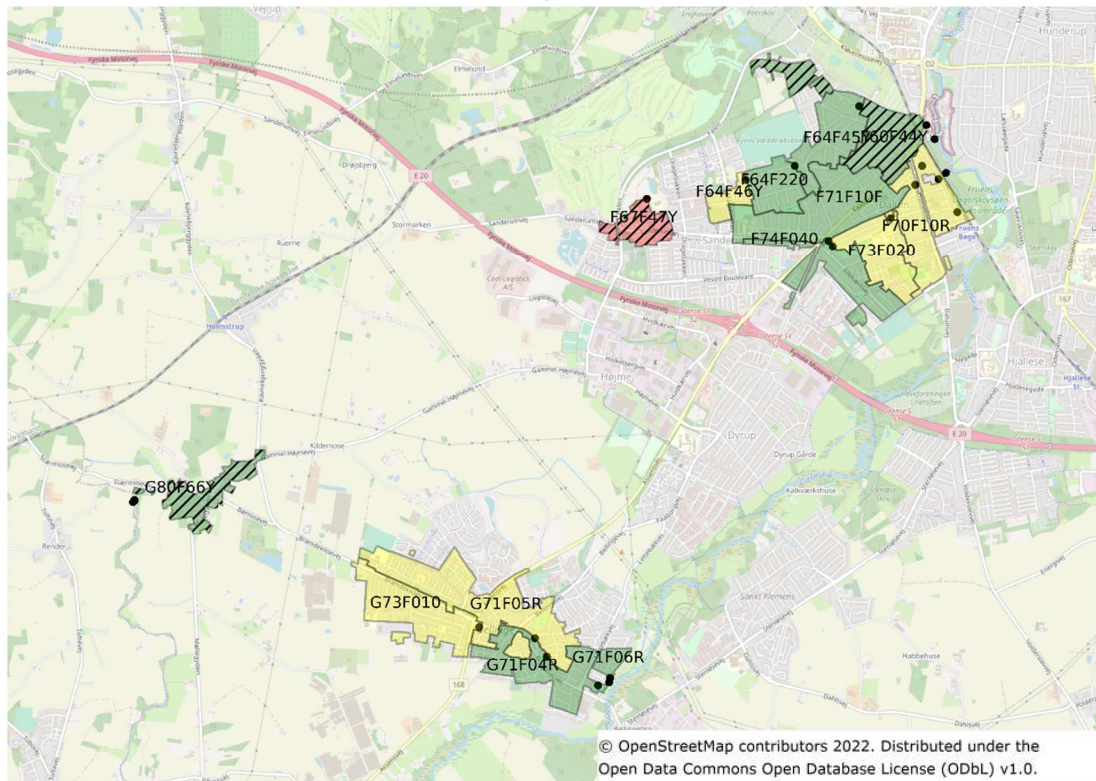

**Figure S26: Map of the performance for everyday event using the method of linear regression. The upstream catchment area of the site is mapped, and the naming in the catchment refers to the overflow structure that is mapped. The catchment area represents the case areas. The urban areas in between the catchment areas are not connected to the case areas, as they have a separate stormwater system. Background map is from OpenStreetMap (2022).**

## 4. References

OpenStreetMap: [www.openstreetmap.org](http://www.openstreetmap.org), last access: 3 February 2022.
